# Supplementary material for: Coinfection with PEDV and BVDV induces inflammatory bowel disease pathway highly enriched in PK-15 cells
Source: Virol J. 2022 Jul 16;19:119. doi: 10.1186/s12985-022-01845-8 (PMC9288691; doi:10.1186/s12985-022-01845-8)
Supplement: Supplementary file 2 — Additional file 2. Gene Ontology analysis of significantly differently expressed proteins in PEDV-infected, BVDV-infected and PEDVBVDV coinfected cells. [file 12985_2022_1845_MOESM2_ESM.xlsx]

## Sheet: Sheet1
GO_ID	GO_Term	GO_Class	Adjusted P value（q value）	Up（n）	IDs(up)	Down(n)	IDs(down)
GO:0005840	ribosome	CC	8.35128e-39	0		67	A0A140UHW4 A0A286ZJJ6 A0A286ZLJ1 A0A286ZU68 A0A287A119 A0A287A143 A0A287ADE6 A0A287AE36 A0A287AEW3 A0A287AJT7 A0A287ANI9 A0A287AR81 A0A287B386 A0A287B5V1 A0A287B929 A0A287BIV6 A0A287BMZ6 A0A287BP93 A0A480I6X7 A0A480JJI1 A0A480KRD0 A0A480QIM3 A0A480TJ23 A0A480VEZ3 A0A480VHU8 A0A480YLY2 A0A4X1SDD8 A0A4X1SK65 A0A4X1SWA8 A0A4X1T326 A0A4X1T3C0 A0A4X1TBV3 A0A4X1TFR5 A0A4X1TPC2 A0A4X1TV98 A0A4X1UDF8 A0A…
GO:0003735	structural constituent of ribosome	MF	5.59463e-38	0		65	A0A140UHW4 A0A286ZJJ6 A0A286ZLJ1 A0A286ZU68 A0A287A119 A0A287A143 A0A287ADE6 A0A287AE36 A0A287AEW3 A0A287AJT7 A0A287ANI9 A0A287AR81 A0A287B386 A0A287B5V1 A0A287B929 A0A287BIV6 A0A287BMZ6 A0A480I6X7 A0A480JJI1 A0A480KRD0 A0A480QIM3 A0A480TJ23 A0A480VEZ3 A0A480VHU8 A0A480YLY2 A0A4X1SDD8 A0A4X1SK65 A0A4X1SWA8 A0A4X1T326 A0A4X1T3C0 A0A4X1TBV3 A0A4X1TFR5 A0A4X1TPC2 A0A4X1TV98 A0A4X1UDF8 A0A4X1ULB7 A0A…
GO:0030529	intracellular ribonucleoprotein complex	CC	1.94675e-27	2	A0A4X1VB17 F2Z5M9	67	A0A140UHW4 A0A286ZJJ6 A0A286ZLJ1 A0A286ZU68 A0A287A119 A0A287A143 A0A287ADE6 A0A287AE36 A0A287AEW3 A0A287AJT7 A0A287ANI9 A0A287AR81 A0A287B386 A0A287B5V1 A0A287B929 A0A287BIV6 A0A287BMZ6 A0A287BP93 A0A480I6X7 A0A480JJI1 A0A480KRD0 A0A480QIM3 A0A480TJ23 A0A480VEZ3 A0A480VHU8 A0A480YLY2 A0A4X1SDD8 A0A4X1SK65 A0A4X1SWA8 A0A4X1T326 A0A4X1T3C0 A0A4X1TBV3 A0A4X1TFR5 A0A4X1TPC2 A0A4X1TV98 A0A4X1UDF8 A0A…
GO:0005198	structural molecule activity	MF	6.1822e-25	10	A0A286ZPT0 A0A480IV89 A0A480PYP5 A0A4X1U9M6 A0A4X1UKW6 C3VPJ5 F1RYV9 F1S6M7 F2Z5B2 P02550	70	A0A140UHW4 A0A286ZJJ6 A0A286ZLJ1 A0A286ZU68 A0A287A119 A0A287A143 A0A287ADE6 A0A287AE36 A0A287AEW3 A0A287AJT7 A0A287ANI9 A0A287AR81 A0A287B386 A0A287B5V1 A0A287B929 A0A287BIV6 A0A287BMZ6 A0A480I6X7 A0A480JJI1 A0A480KRD0 A0A480QIM3 A0A480TJ23 A0A480V8D3 A0A480VEZ3 A0A480VHU8 A0A480VRY6 A0A480YLY2 A0A480ZZB1 A0A4X1SDD8 A0A4X1SK65 A0A4X1SWA8 A0A4X1T326 A0A4X1T3C0 A0A4X1TBV3 A0A4X1TFR5 A0A4X1TPC2 A0A…
GO:0006412	translation	BP	4.54554e-17	3	A0A287BKF1 A0A4X1TPC7 A0A5G2QIG8	66	A0A140UHW4 A0A286ZJJ6 A0A286ZLJ1 A0A286ZU68 A0A286ZWZ5 A0A287A119 A0A287A143 A0A287ADE6 A0A287AE36 A0A287AEW3 A0A287AJT7 A0A287ANI9 A0A287B386 A0A287B5V1 A0A287B929 A0A287BIV6 A0A287BMZ6 A0A480I6X7 A0A480JJI1 A0A480KRD0 A0A480QIM3 A0A480TJ23 A0A480VEZ3 A0A480VHU8 A0A480YLY2 A0A4X1SDD8 A0A4X1SK65 A0A4X1SWA8 A0A4X1T326 A0A4X1T3C0 A0A4X1TBV3 A0A4X1TFR5 A0A4X1TPC2 A0A4X1TV98 A0A4X1UDF8 A0A4X1ULB7 A0A…
GO:0043603	cellular amide metabolic process	BP	1.52811e-16	5	A0A287BKF1 A0A480QU32 A0A480ZBA0 A0A4X1TPC7 A0A5G2QIG8	68	A0A140UHW4 A0A286ZJJ6 A0A286ZLJ1 A0A286ZU68 A0A286ZWZ5 A0A287A119 A0A287A143 A0A287ADE6 A0A287AE36 A0A287AEW3 A0A287AJT7 A0A287ANI9 A0A287B386 A0A287B5V1 A0A287B929 A0A287BIV6 A0A287BMZ6 A0A480I6X7 A0A480JJI1 A0A480KRD0 A0A480QIM3 A0A480TJ23 A0A480VEZ3 A0A480VHU8 A0A480YLY2 A0A4X1SDD8 A0A4X1SK65 A0A4X1SWA8 A0A4X1T024 A0A4X1T326 A0A4X1T3C0 A0A4X1TBV3 A0A4X1TFR5 A0A4X1TPC2 A0A4X1TV98 A0A4X1UDF8 A0A…
GO:0006518	peptide metabolic process	BP	1.61156e-16	4	A0A287BKF1 A0A480QU32 A0A4X1TPC7 A0A5G2QIG8	67	A0A140UHW4 A0A286ZJJ6 A0A286ZLJ1 A0A286ZU68 A0A286ZWZ5 A0A287A119 A0A287A143 A0A287ADE6 A0A287AE36 A0A287AEW3 A0A287AJT7 A0A287ANI9 A0A287B386 A0A287B5V1 A0A287B929 A0A287BIV6 A0A287BMZ6 A0A480I6X7 A0A480JJI1 A0A480KRD0 A0A480QIM3 A0A480TJ23 A0A480VEZ3 A0A480VHU8 A0A480YLY2 A0A4X1SDD8 A0A4X1SK65 A0A4X1SWA8 A0A4X1T326 A0A4X1T3C0 A0A4X1TBV3 A0A4X1TFR5 A0A4X1TPC2 A0A4X1TV98 A0A4X1UDF8 A0A4X1ULB7 A0A…
GO:0043232	intracellular non-membrane-bounded organelle	CC	8.13468e-10	21	A0A287B6W3 A0A287B9C3 A0A287BFX9 A0A287BL20 A0A480IV89 A0A480PQZ4 A0A4X1SDG3 A0A4X1U9M6 A0A4X1UW28 A0A4X1V6Y6 A0A4X1VBP3 A0A4X1VPQ0 A0A4X1VSD1 A0A5G2QDV6 F1RYV9 F1S6M7 F2Z5B2 I3L5I4 P02550 P06348 Q71LE2	82	A0A140UHW4 A0A286ZJJ6 A0A286ZLJ1 A0A286ZPP2 A0A286ZR45 A0A286ZU68 A0A287A119 A0A287A143 A0A287ADE6 A0A287AE36 A0A287AEW3 A0A287AJT7 A0A287ANI9 A0A287AR81 A0A287B386 A0A287B5V1 A0A287B929 A0A287BIV6 A0A287BMZ6 A0A287BP93 A0A480I6X7 A0A480JJI1 A0A480KRD0 A0A480MY17 A0A480QIM3 A0A480TJ23 A0A480V3H3 A0A480VEZ3 A0A480VHU8 A0A480VRY6 A0A480YLY2 A0A480ZZB1 A0A4X1SDD8 A0A4X1SK65 A0A4X1SWA8 A0A4X1T326 A0A…
GO:0002376	immune system process	BP	1.069e-09	34	A0A0A7BZG5 A0A0A7BZQ2 A0A1S6QUX2 A0A287A8Q1 A0A287AAP1 A0A287AR04 A0A287B0R8 A0A287BKF1 A0A3G5MUM7 A0A480LCE7 A0A480VMH3 A0A481DLT0 A0A4X1SEB3 A0A4X1T497 A0A4X1TNY1 A0A4X1UCD9 A0A4X1UYW6 A0A4X1V9S3 A0A4X1VBP3 A0A5G2QCN4 A0A5G2R7R1 A4ZVH6 A5D9J3 A7ISN8 F1RYM5 G0KXP8 G0KXQ7 G8EGP8 K7GME6 O19194 Q29599 Q2PT65 Q5MX78 Q8SQ34	1	A0A140CQ62
GO:1901566	organonitrogen compound biosynthetic process	BP	1.35131e-09	9	A0A287B3Y5 A0A287BKF1 A0A480PP50 A0A4X1TPC7 A0A4X1U4G5 A0A4X1V0A0 A0A4X1VBX0 A0A5G2QIG8 P80230	69	A0A140UHW4 A0A286ZJJ6 A0A286ZLJ1 A0A286ZU68 A0A286ZWZ5 A0A287A119 A0A287A143 A0A287ADE6 A0A287AE36 A0A287AEW3 A0A287AJT7 A0A287ANI9 A0A287B386 A0A287B5V1 A0A287B929 A0A287BIV6 A0A287BMZ6 A0A480I6X7 A0A480JJI1 A0A480KRD0 A0A480QIM3 A0A480TJ23 A0A480VEZ3 A0A480VHU8 A0A480YLY2 A0A4X1SDD8 A0A4X1SK65 A0A4X1SWA8 A0A4X1T326 A0A4X1T3C0 A0A4X1TBV3 A0A4X1TCS4 A0A4X1TFR5 A0A4X1TPC2 A0A4X1TV98 A0A4X1UDF8 A0A…
GO:1901564	organonitrogen compound metabolic process	BP	2.16761e-08	11	A0A287B3Y5 A0A287BKF1 A0A480PP50 A0A480QU32 A0A480ZBA0 A0A4X1TPC7 A0A4X1U4G5 A0A4X1V0A0 A0A4X1VBX0 A0A5G2QIG8 P80230	81	A0A140UHW4 A0A286ZJJ6 A0A286ZLJ1 A0A286ZT99 A0A286ZU68 A0A286ZVG0 A0A286ZWZ5 A0A287A119 A0A287A143 A0A287ADE6 A0A287AE36 A0A287AEW3 A0A287AJT7 A0A287ANI9 A0A287B386 A0A287B5V1 A0A287B929 A0A287BIV6 A0A287BMZ6 A0A480I6X7 A0A480JJI1 A0A480KRD0 A0A480QIM3 A0A480TJ23 A0A480VEZ3 A0A480VHU8 A0A480YLY2 A0A4X1SDD8 A0A4X1SK65 A0A4X1SS08 A0A4X1SWA8 A0A4X1T024 A0A4X1T326 A0A4X1T3C0 A0A4X1TBV3 A0A4X1TCS4 A0A…
GO:0006955	immune response	BP	2.98836e-08	28	A0A0A7BZG5 A0A0A7BZQ2 A0A1S6QUX2 A0A287A8Q1 A0A287AAP1 A0A287AR04 A0A287B0R8 A0A287BKF1 A0A3G5MUM7 A0A480LCE7 A0A480VMH3 A0A4X1SEB3 A0A4X1T497 A0A4X1V9S3 A0A5G2QCN4 A0A5G2R7R1 A4ZVH6 A7ISN8 F1RYM5 G0KXP8 G0KXQ7 G8EGP8 K7GME6 O19194 Q29599 Q2PT65 Q5MX78 Q8SQ34	1	A0A140CQ62
GO:0044271	cellular nitrogen compound biosynthetic process	BP	2.30287e-07	18	A0A286ZS25 A0A287AR04 A0A287AUH8 A0A287B3Y5 A0A287BK33 A0A287BKF1 A0A480ERI8 A0A480PP50 A0A4X1T295 A0A4X1TPC7 A0A4X1U4G5 A0A4X1UC71 A0A4X1V0A0 A0A4X1VBX0 A0A5G2QIG8 F1S2W1 F6PVF4 P80230	72	A0A140UHW4 A0A286ZJJ6 A0A286ZLJ1 A0A286ZU68 A0A286ZWZ5 A0A286ZZ97 A0A287A119 A0A287A143 A0A287ADE6 A0A287AE36 A0A287AEW3 A0A287AJT7 A0A287ANI9 A0A287B386 A0A287B5V1 A0A287B929 A0A287BIV6 A0A287BMZ6 A0A480I6X7 A0A480JJI1 A0A480KRD0 A0A480QIM3 A0A480TJ23 A0A480VEZ3 A0A480VHU8 A0A480YLY2 A0A4X1SDD8 A0A4X1SK65 A0A4X1SWA8 A0A4X1T326 A0A4X1T3C0 A0A4X1TBV3 A0A4X1TCS4 A0A4X1TFR5 A0A4X1TPC2 A0A4X1TV98 A0A…
GO:0044459	plasma membrane part	CC	8.71677e-07	7	A0A480VMH3 A0A481ARM8 A0A4X1V9S3 A0A4X1VBP3 A0A5G2QCN4 A7ISN8 Q8SQ34	16	A0A286ZZ97 A0A287BAN5 A0A287BBR1 A0A480E4T9 A0A480EL17 A0A480IQI2 A0A480LPQ0 A0A480QKY5 A0A480Y2R6 A0A4X1SF55 A0A4X1U5D9 A0A4X1W922 A0A5K1V0Y8 B2CZF5 G8GCE6 P05027
GO:0019882	antigen processing and presentation	BP	4.94105e-06	17	A0A0A7BZG5 A0A0A7BZQ2 A0A287AAP1 A0A287B0R8 A0A3G5MUM7 A0A480VMH3 A0A481DLT0 A0A4X1TNY1 A0A4X1UYW6 A0A5G2QCN4 A4ZVH6 A5D9J3 A7ISN8 G0KXP8 G0KXQ7 O19194 Q2PT65	0
GO:0005886	plasma membrane	CC	8.40125e-06	7	A0A480VMH3 A0A481ARM8 A0A4X1V9S3 A0A4X1VBP3 A0A5G2QCN4 A7ISN8 Q8SQ34	18	A0A286ZZ97 A0A287ALD4 A0A287B737 A0A287BAN5 A0A287BBR1 A0A480E4T9 A0A480EL17 A0A480IQI2 A0A480LPQ0 A0A480QKY5 A0A480Y2R6 A0A4X1SF55 A0A4X1U5D9 A0A4X1W922 A0A5K1V0Y8 B2CZF5 G8GCE6 P05027
GO:0034645	cellular macromolecule biosynthetic process	BP	1.89044e-05	17	A0A286ZS25 A0A287BK33 A0A287BKF1 A0A480ERI8 A0A480KQ60 A0A4X1SFI4 A0A4X1T295 A0A4X1TNF0 A0A4X1TPC7 A0A4X1UC71 A0A4X1UEG3 A0A4X1UUZ0 A0A4X1V6Y6 A0A5G2QIG8 F1RX70 F1S2W1 F6PVF4	70	A0A140UHW4 A0A286ZJJ6 A0A286ZLJ1 A0A286ZU68 A0A286ZWZ5 A0A286ZZ97 A0A287A0V1 A0A287A119 A0A287A143 A0A287ADE6 A0A287AE36 A0A287AEW3 A0A287AJT7 A0A287ANI9 A0A287B386 A0A287B5V1 A0A287B929 A0A287BIV6 A0A287BMZ6 A0A480I6X7 A0A480JJI1 A0A480KRD0 A0A480QIM3 A0A480TJ23 A0A480VEZ3 A0A480VHU8 A0A480YLY2 A0A4X1SDD8 A0A4X1SK65 A0A4X1SWA8 A0A4X1T326 A0A4X1T3C0 A0A4X1TBV3 A0A4X1TFR5 A0A4X1TPC2 A0A4X1TV98 A0A…
GO:0051607	defense response to virus	BP	0.000154866	9	A0A1S6QUX2 A0A287A8Q1 A0A287AR04 A0A480LCE7 A0A4X1SEB3 A0A4X1T497 A0A4X1UCD9 Q29599 Q5MX78	1	A0A140CQ62
GO:1901576	organic substance biosynthetic process	BP	0.000154866	29	A0A286ZS25 A0A287AR04 A0A287B3Y5 A0A287BK33 A0A287BKF1 A0A480ERI8 A0A480KQ60 A0A480PP50 A0A481CVE5 A0A4X1SFI4 A0A4X1T295 A0A4X1TM21 A0A4X1TNF0 A0A4X1TPC7 A0A4X1U4G5 A0A4X1U637 A0A4X1UC71 A0A4X1UEG3 A0A4X1UUZ0 A0A4X1V0A0 A0A4X1V6Y6 A0A4X1VBX0 A0A4X1VJ96 A0A5G2QIG8 F1RX70 F1S2W1 F1SMG8 F6PVF4 P80230	81	A0A140UHW4 A0A286ZJJ6 A0A286ZLJ1 A0A286ZU68 A0A286ZWZ5 A0A286ZZ97 A0A287A0V1 A0A287A119 A0A287A143 A0A287A6U6 A0A287ADE6 A0A287AE36 A0A287AES5 A0A287AEW3 A0A287AJT7 A0A287ANI9 A0A287B386 A0A287B5V1 A0A287B929 A0A287B9V5 A0A287BIV6 A0A287BMZ6 A0A480I6X7 A0A480JJI1 A0A480KRD0 A0A480QIM3 A0A480TJ23 A0A480VEZ3 A0A480VHU8 A0A480YLY2 A0A4X1SDD8 A0A4X1SK65 A0A4X1SWA8 A0A4X1T326 A0A4X1T3C0 A0A4X1TBV3 A0A…
GO:0009058	biosynthetic process	BP	0.000171678	32	A0A286ZNE7 A0A286ZS25 A0A287AR04 A0A287AUH8 A0A287B3Y5 A0A287BK33 A0A287BKF1 A0A480ERI8 A0A480KQ60 A0A480PP50 A0A481CVE5 A0A4X1SFI4 A0A4X1T295 A0A4X1TM21 A0A4X1TNF0 A0A4X1TPC7 A0A4X1U4G5 A0A4X1U637 A0A4X1U8L3 A0A4X1UC71 A0A4X1UEG3 A0A4X1UUZ0 A0A4X1V0A0 A0A4X1V6Y6 A0A4X1VBX0 A0A4X1VJ96 A0A5G2QIG8 F1RX70 F1S2W1 F1SMG8 F6PVF4 P80230	84	A0A140UHW4 A0A286ZJJ6 A0A286ZLJ1 A0A286ZU68 A0A286ZWZ5 A0A286ZZ97 A0A287A0V1 A0A287A119 A0A287A143 A0A287A6U6 A0A287ADE6 A0A287AE36 A0A287AES5 A0A287AEW3 A0A287AJT7 A0A287ANI9 A0A287B386 A0A287B5V1 A0A287B929 A0A287B9V5 A0A287BIV6 A0A287BMZ6 A0A480I6X7 A0A480JJI1 A0A480KRD0 A0A480QIM3 A0A480R857 A0A480TJ23 A0A480VEZ3 A0A480VHU8 A0A480YLY2 A0A4X1SDD8 A0A4X1SK65 A0A4X1SWA8 A0A4X1T326 A0A4X1T3C0 A0A…
GO:0044249	cellular biosynthetic process	BP	0.00025643	30	A0A286ZS25 A0A287AR04 A0A287AUH8 A0A287B3Y5 A0A287BK33 A0A287BKF1 A0A480ERI8 A0A480KQ60 A0A480PP50 A0A481CVE5 A0A4X1SFI4 A0A4X1T295 A0A4X1TM21 A0A4X1TNF0 A0A4X1TPC7 A0A4X1U4G5 A0A4X1U637 A0A4X1UC71 A0A4X1UEG3 A0A4X1UUZ0 A0A4X1V0A0 A0A4X1V6Y6 A0A4X1VBX0 A0A4X1VJ96 A0A5G2QIG8 F1RX70 F1S2W1 F1SMG8 F6PVF4 P80230	78	A0A140UHW4 A0A286ZJJ6 A0A286ZLJ1 A0A286ZU68 A0A286ZWZ5 A0A286ZZ97 A0A287A0V1 A0A287A119 A0A287A143 A0A287ADE6 A0A287AE36 A0A287AEW3 A0A287AJT7 A0A287ANI9 A0A287B386 A0A287B5V1 A0A287B929 A0A287B9V5 A0A287BIV6 A0A287BMZ6 A0A480I6X7 A0A480JJI1 A0A480KRD0 A0A480QIM3 A0A480TJ23 A0A480VEZ3 A0A480VHU8 A0A480YLY2 A0A4X1SDD8 A0A4X1SK65 A0A4X1SWA8 A0A4X1T326 A0A4X1T3C0 A0A4X1TBV3 A0A4X1TCS4 A0A4X1TFR5 A0A…
GO:0003725	double-stranded RNA binding	MF	0.000276599	8	A0A1S6QUX2 A0A287A202 A0A287A8Q1 A0A287BKF1 A0A480LCE7 A0A4X1T497 Q29599 Q5MX78	1	A0A140CQ62
GO:0071944	cell periphery	CC	0.000276599	8	A0A287AZQ5 A0A480VMH3 A0A481ARM8 A0A4X1V9S3 A0A4X1VBP3 A0A5G2QCN4 A7ISN8 Q8SQ34	18	A0A286ZZ97 A0A287ALD4 A0A287B737 A0A287BAN5 A0A287BBR1 A0A480E4T9 A0A480EL17 A0A480IQI2 A0A480LPQ0 A0A480QKY5 A0A480Y2R6 A0A4X1SF55 A0A4X1U5D9 A0A4X1W922 A0A5K1V0Y8 B2CZF5 G8GCE6 P05027
GO:0016032	viral process	BP	0.000276599	11	A0A1S6QUX2 A0A287A0G8 A0A287A8Q1 A0A287AR04 A0A287BKF1 A0A480LCE7 A0A4X1SEB3 A0A4X1T497 A0A4X1UCD9 Q29599 Q5MX78	2	A0A140CQ62 A0A5G2QAR3
GO:0051707	response to other organism	BP	0.00034719	11	A0A1S6QUX2 A0A287A8Q1 A0A287AR04 A0A287B0A1 A0A287BKF1 A0A480LCE7 A0A4X1SEB3 A0A4X1T497 A0A4X1UCD9 Q29599 Q5MX78	1	A0A140CQ62
GO:0044444	cytoplasmic part	CC	0.000358786	12	A0A286ZPT0 A0A287AZQ5 A0A480PYP5 A0A480ZBA0 A0A4X1SGW5 A0A4X1TNY1 A0A4X1UYW6 A0A4X1W722 A5D9J3 F1SBH2 F2Z5M9 I3LGX9	87	A0A140UHW4 A0A286ZJJ6 A0A286ZLJ1 A0A286ZU68 A0A286ZVG0 A0A287A119 A0A287A143 A0A287ADE6 A0A287AE36 A0A287AEW3 A0A287AJT7 A0A287ANF8 A0A287ANI9 A0A287AR81 A0A287B386 A0A287B5V1 A0A287B929 A0A287BIV6 A0A287BMZ6 A0A287BP93 A0A480I6X7 A0A480IMP9 A0A480JJI1 A0A480KRD0 A0A480LW62 A0A480M5F4 A0A480QIM3 A0A480TJ23 A0A480TN51 A0A480VEZ3 A0A480VHU8 A0A480YLY2 A0A4X1SDD8 A0A4X1SK65 A0A4X1SWA8 A0A4X1T326 A0A…
GO:0009615	response to virus	BP	0.000416744	10	A0A1S6QUX2 A0A287A8Q1 A0A287AR04 A0A287BKF1 A0A480LCE7 A0A4X1SEB3 A0A4X1T497 A0A4X1UCD9 Q29599 Q5MX78	1	A0A140CQ62
GO:0051704	multi-organism process	BP	0.000416963	12	A0A1S6QUX2 A0A287A0G8 A0A287A8Q1 A0A287AR04 A0A287B0A1 A0A287BKF1 A0A480LCE7 A0A4X1SEB3 A0A4X1T497 A0A4X1UCD9 Q29599 Q5MX78	3	A0A140CQ62 A0A4X1UKB5 A0A5G2QAR3
GO:0009605	response to external stimulus	BP	0.000462617	15	A0A1S6QUX2 A0A287A8Q1 A0A287AR04 A0A287B0A1 A0A287BKF1 A0A480LCE7 A0A4X1SEB3 A0A4X1T497 A0A4X1UCD9 A0A4X1VBP3 F1SM08 G8EGP8 K7GME6 Q29599 Q5MX78	1	A0A140CQ62
GO:0004497	monooxygenase activity	MF	0.0019851	5	A0A287AUH8 A0A480VJX3 A7L861 D0G6S0 I3LEX8	3	A0A0H4IV20 A0A0H4J4A5 A0A4X1SM21
GO:0044391	ribosomal subunit	CC	0.0019851	0		8	A0A287AR81 A0A287B386 A0A4X1T326 A0A4X1W4F3 A0A5G2QLT3 A0A5G2RBH3 F1S8A5 I3LTC4
GO:0006952	defense response	BP	0.00252375	13	A0A1S6QUX2 A0A287A8Q1 A0A287AR04 A0A287BKF1 A0A480LCE7 A0A4X1SEB3 A0A4X1T497 A0A4X1TM21 A0A4X1UCD9 A0A5G2R7R1 K7GME6 Q29599 Q5MX78	1	A0A140CQ62
GO:0005764	lysosome	CC	0.0035172	0		6	A0A286ZVG0 A0A480M5F4 A0A480TN51 K9IVU5 P00795 P81405
GO:0005576	extracellular region	CC	0.00890132	9	A0A287AFQ7 A0A480R7Q5 A0A4X1UAV7 A0A4X1UFQ6 A0A5G2R7R1 F1S279 F1S662 G8EGP8 P07200	10	A0A287BAY9 A0A287BHC5 A0A480Z6T4 A0A4X1TPX3 A0A4X1TWH6 A0A4X1TYA4 A0A4X1U844 A0A4X1W1F9 F1SLX2 K7GM40
GO:0005887	integral component of plasma membrane	CC	0.0137396	1	A0A481ARM8	12	A0A287BAN5 A0A480E4T9 A0A480EL17 A0A480IQI2 A0A480LPQ0 A0A480QKY5 A0A480Y2R6 A0A4X1U5D9 A0A4X1W922 A0A5K1V0Y8 B2CZF5 P05027
GO:0015934	large ribosomal subunit	CC	0.0182298	0		5	A0A287B386 A0A4X1T326 A0A4X1W4F3 A0A5G2QLT3 I3LTC4
GO:0005761	mitochondrial ribosome	CC	0.0182298	0		5	A0A287AR81 A0A287BP93 A0A4X1USF0 F1S8A5 F1SGC7
GO:0098797	plasma membrane protein complex	CC	0.0204407	5	A0A480VMH3 A0A481ARM8 A0A4X1V9S3 A0A5G2QCN4 A7ISN8	7	A0A287BAN5 A0A287BBR1 A0A480E4T9 A0A480IQI2 A0A480QKY5 A0A480Y2R6 P05027
GO:0005996	monosaccharide metabolic process	BP	0.0283827	2	A0A4X1T6D2 A0A5G2QDU1	7	A0A287AES5 A0A287B9V5 A0A4X1VXR8 A0A5G2R0E8 A0A5G2R599 F1SAC0 K7GND0
GO:0010467	gene expression	BP	0.0339952	15	A0A286ZPJ7 A0A286ZS25 A0A287A496 A0A287BK33 A0A287BKF1 A0A287BKG3 A0A480ERI8 A0A480QU32 A0A4X1SY52 A0A4X1T295 A0A4X1TPC7 A0A4X1UC71 A0A5G2QIG8 F1S2W1 F6PVF4	70	A0A140UHW4 A0A286ZJJ6 A0A286ZLJ1 A0A286ZU68 A0A286ZWZ5 A0A286ZZ97 A0A287A119 A0A287A143 A0A287ADE6 A0A287AE36 A0A287AEW3 A0A287AJT7 A0A287ANI9 A0A287B386 A0A287B5V1 A0A287B929 A0A287BIV6 A0A287BMZ6 A0A480I6X7 A0A480JJI1 A0A480KRD0 A0A480MTN6 A0A480QIM3 A0A480TJ23 A0A480VEZ3 A0A480VHU8 A0A480YLY2 A0A4X1SDD8 A0A4X1SK65 A0A4X1SWA8 A0A4X1T326 A0A4X1T3C0 A0A4X1TBV3 A0A4X1TFR5 A0A4X1TPC2 A0A4X1TV98 A0A…
GO:0005975	carbohydrate metabolic process	BP	0.0344276	6	A0A287BG16 A0A4X1T6D2 A0A4X1VTU2 A0A5G2QDU1 F1SNW8 K7GRB9	20	A0A287A7V3 A0A287AES5 A0A287B1C9 A0A287B9V5 A0A480MRN4 A0A480QMY9 A0A4X1SJS4 A0A4X1SPP3 A0A4X1UDU6 A0A4X1VJV9 A0A4X1VXR8 A0A4X1W3P2 A0A4X1W6B2 A0A5G2R0E8 A0A5G2R599 F1RIP1 F1SAC0 F1SPA3 K7GND0 Q4FAT7
GO:0044421	extracellular region part	CC	0.0344276	5	A0A480R7Q5 A0A4X1UAV7 A0A5G2R7R1 F1S662 P07200	7	A0A287BAY9 A0A287BHC5 A0A480Z6T4 A0A4X1TPX3 A0A4X1TYA4 A0A4X1U844 F1SLX2

## Sheet: Sheet2
GO_ID	GO_Term	GO_Class	Adjusted P value（q value）	Up（n）	IDs(up)	Down(n)	IDs(down)
GO:0003735	structural constituent of ribosome	MF	5.32213e-11	0		54	A0A286ZLJ1 A0A286ZU68 A0A287A119 A0A287A143 A0A287AE36 A0A287AJT7 A0A287ANI9 A0A287APR1 A0A287ASU4 A0A287B386 A0A287B5V1 A0A287B929 A0A287BHE7 A0A287BMZ6 A0A480I6X7 A0A480KRD0 A0A480TJ23 A0A480VEZ3 A0A480VHU8 A0A480YLY2 A0A4X1SDD8 A0A4X1SK65 A0A4X1SWA8 A0A4X1T0T4 A0A4X1T326 A0A4X1T6D6 A0A4X1TBV3 A0A4X1TFR5 A0A4X1TPC2 A0A4X1TRI7 A0A4X1TV98 A0A4X1U3N9 A0A4X1UCV5 A0A4X1UDF8 A0A4X1ULB7 A0A4X1VRZ2 A0A…
GO:0005840	ribosome	CC	5.32213e-11	0		55	A0A286ZLJ1 A0A286ZU68 A0A287A119 A0A287A143 A0A287AE36 A0A287AJT7 A0A287ANI9 A0A287APR1 A0A287ASU4 A0A287B386 A0A287B5V1 A0A287B929 A0A287BHE7 A0A287BMZ6 A0A480I6X7 A0A480KRD0 A0A480TJ23 A0A480VEZ3 A0A480VHU8 A0A480YLY2 A0A4X1SDD8 A0A4X1SK65 A0A4X1SWA8 A0A4X1T0T4 A0A4X1T326 A0A4X1T6D6 A0A4X1TBV3 A0A4X1TFR5 A0A4X1TPC2 A0A4X1TRI7 A0A4X1TV98 A0A4X1U3N9 A0A4X1UCV5 A0A4X1UDF8 A0A4X1ULB7 A0A4X1VRZ2 A0A…
GO:0030529	intracellular ribonucleoprotein complex	CC	6.34122e-09	6	A0A4X1TXE2 A0A4X1U2G4 A0A4X1U6X7 A0A4X1V930 A0A4X1VB17 F2Z5M9	56	A0A286ZLJ1 A0A286ZU68 A0A287A119 A0A287A143 A0A287AE36 A0A287AJT7 A0A287ANI9 A0A287APR1 A0A287ASU4 A0A287B386 A0A287B5V1 A0A287B929 A0A287BHE7 A0A287BMZ6 A0A480I6X7 A0A480KRD0 A0A480TJ23 A0A480VEZ3 A0A480VHU8 A0A480YLY2 A0A480Z524 A0A4X1SDD8 A0A4X1SK65 A0A4X1SWA8 A0A4X1T0T4 A0A4X1T326 A0A4X1T6D6 A0A4X1TBV3 A0A4X1TFR5 A0A4X1TPC2 A0A4X1TRI7 A0A4X1TV98 A0A4X1U3N9 A0A4X1UCV5 A0A4X1UDF8 A0A4X1ULB7 A0A…
GO:0043603	cellular amide metabolic process	BP	1.50095e-07	7	A0A287BKF1 A0A480QU32 A0A4X1UHR2 A0A4X1VWP5 A0A4X1W415 B3VKQ2 F1RXU4	69	A0A286ZLJ1 A0A286ZU68 A0A286ZWZ5 A0A287A119 A0A287A143 A0A287A3Q5 A0A287AE36 A0A287AJT7 A0A287ANI9 A0A287APR1 A0A287ASU4 A0A287B386 A0A287B5V1 A0A287B929 A0A287BHE7 A0A287BMZ6 A0A480I6X7 A0A480JIP6 A0A480K1F4 A0A480KRD0 A0A480T775 A0A480TJ23 A0A480VEZ3 A0A480VHU8 A0A480YLY2 A0A4X1SDD8 A0A4X1SK65 A0A4X1ST55 A0A4X1SWA8 A0A4X1T024 A0A4X1T0T4 A0A4X1T326 A0A4X1T6D6 A0A4X1TBV3 A0A4X1TFR5 A0A4X1TGG9 A0A…
GO:0009059	macromolecule biosynthetic process	BP	4.31416e-07	42	A0A286ZS25 A0A286ZY03 A0A286ZZT8 A0A287AE97 A0A287AEZ6 A0A287AP94 A0A287BK33 A0A287BKF1 A0A480ERI8 A0A480L8C4 A0A480LVG3 A0A4X1SEN5 A0A4X1SFQ6 A0A4X1SGD0 A0A4X1T4E4 A0A4X1TI73 A0A4X1TLM6 A0A4X1TN45 A0A4X1TNF0 A0A4X1TTD0 A0A4X1UC71 A0A4X1UEG3 A0A4X1UM00 A0A4X1V0Z9 A0A4X1VHC5 A0A4X1W415 A0A4X1W6H2 A0A5G2QD74 A5GFW7 B3VKQ2 F1RHL1 F1RXU4 F1S2W1 F1S5B5 F1S937 F1SJY0 F6PVF4 I3LJE5 I3LU42 J7FNA4 M3V837 …	79	A0A286ZLJ1 A0A286ZU68 A0A286ZWZ5 A0A286ZXN6 A0A286ZZ97 A0A287A119 A0A287A143 A0A287A3Q5 A0A287AD55 A0A287ADJ6 A0A287AE36 A0A287AJT7 A0A287AMH2 A0A287ANI9 A0A287APR1 A0A287ASU4 A0A287B386 A0A287B5V1 A0A287B929 A0A287BHE7 A0A287BMZ6 A0A480I6X7 A0A480JIP6 A0A480JQM5 A0A480K0X2 A0A480KRD0 A0A480KT22 A0A480T775 A0A480TJ23 A0A480VEZ3 A0A480VHU8 A0A480YLY2 A0A481D866 A0A4X1SDD8 A0A4X1SK65 A0A4X1ST55 A0A…
GO:0034645	cellular macromolecule biosynthetic process	BP	5.1216e-07	40	A0A286ZS25 A0A286ZY03 A0A286ZZT8 A0A287AE97 A0A287AEZ6 A0A287AP94 A0A287BK33 A0A287BKF1 A0A480ERI8 A0A480L8C4 A0A480LVG3 A0A4X1SEN5 A0A4X1SFQ6 A0A4X1SGD0 A0A4X1T4E4 A0A4X1TI73 A0A4X1TLM6 A0A4X1TN45 A0A4X1TNF0 A0A4X1TTD0 A0A4X1UC71 A0A4X1UEG3 A0A4X1UM00 A0A4X1V0Z9 A0A4X1VHC5 A0A4X1W6H2 A0A5G2QD74 A5GFW7 B3VKQ2 F1RHL1 F1S2W1 F1S5B5 F1S937 F1SJY0 F6PVF4 I3LJE5 I3LU42 J7FNA4 M3V837 Q0KKC2	79	A0A286ZLJ1 A0A286ZU68 A0A286ZWZ5 A0A286ZXN6 A0A286ZZ97 A0A287A119 A0A287A143 A0A287A3Q5 A0A287AD55 A0A287ADJ6 A0A287AE36 A0A287AJT7 A0A287AMH2 A0A287ANI9 A0A287APR1 A0A287ASU4 A0A287B386 A0A287B5V1 A0A287B929 A0A287BHE7 A0A287BMZ6 A0A480I6X7 A0A480JIP6 A0A480JQM5 A0A480K0X2 A0A480KRD0 A0A480KT22 A0A480T775 A0A480TJ23 A0A480VEZ3 A0A480VHU8 A0A480YLY2 A0A481D866 A0A4X1SDD8 A0A4X1SK65 A0A4X1ST55 A0A…
GO:0043043	peptide biosynthetic process	BP	5.69151e-07	2	A0A287BKF1 B3VKQ2	68	A0A286ZLJ1 A0A286ZU68 A0A286ZWZ5 A0A287A119 A0A287A143 A0A287A3Q5 A0A287AE36 A0A287AJT7 A0A287ANI9 A0A287APR1 A0A287ASU4 A0A287B386 A0A287B5V1 A0A287B929 A0A287BHE7 A0A287BMZ6 A0A480I6X7 A0A480JIP6 A0A480K1F4 A0A480KRD0 A0A480T775 A0A480TJ23 A0A480VEZ3 A0A480VHU8 A0A480YLY2 A0A4X1SDD8 A0A4X1SK65 A0A4X1ST55 A0A4X1SWA8 A0A4X1T0T4 A0A4X1T326 A0A4X1T6D6 A0A4X1TBV3 A0A4X1TFR5 A0A4X1TGG9 A0A4X1TPC2 A0A…
GO:0006518	peptide metabolic process	BP	6.92927e-07	4	A0A287BKF1 A0A480QU32 A0A4X1VWP5 B3VKQ2	68	A0A286ZLJ1 A0A286ZU68 A0A286ZWZ5 A0A287A119 A0A287A143 A0A287A3Q5 A0A287AE36 A0A287AJT7 A0A287ANI9 A0A287APR1 A0A287ASU4 A0A287B386 A0A287B5V1 A0A287B929 A0A287BHE7 A0A287BMZ6 A0A480I6X7 A0A480JIP6 A0A480K1F4 A0A480KRD0 A0A480T775 A0A480TJ23 A0A480VEZ3 A0A480VHU8 A0A480YLY2 A0A4X1SDD8 A0A4X1SK65 A0A4X1ST55 A0A4X1SWA8 A0A4X1T0T4 A0A4X1T326 A0A4X1T6D6 A0A4X1TBV3 A0A4X1TFR5 A0A4X1TGG9 A0A4X1TPC2 A0A…
GO:0006412	translation	BP	1.41278e-06	2	A0A287BKF1 B3VKQ2	66	A0A286ZLJ1 A0A286ZU68 A0A286ZWZ5 A0A287A119 A0A287A143 A0A287A3Q5 A0A287AE36 A0A287AJT7 A0A287ANI9 A0A287APR1 A0A287ASU4 A0A287B386 A0A287B5V1 A0A287B929 A0A287BHE7 A0A287BMZ6 A0A480I6X7 A0A480JIP6 A0A480KRD0 A0A480T775 A0A480TJ23 A0A480VEZ3 A0A480VHU8 A0A480YLY2 A0A4X1SDD8 A0A4X1SK65 A0A4X1ST55 A0A4X1SWA8 A0A4X1T0T4 A0A4X1T326 A0A4X1T6D6 A0A4X1TBV3 A0A4X1TFR5 A0A4X1TGG9 A0A4X1TPC2 A0A4X1TQD7 A0A…
GO:1901576	organic substance biosynthetic process	BP	2.93404e-06	56	A0A286ZS25 A0A286ZY03 A0A286ZZT8 A0A287AE97 A0A287AEZ6 A0A287AP94 A0A287BK33 A0A287BKF1 A0A480ERI8 A0A480L8C4 A0A480LVG3 A0A480V5L5 A0A481CVE5 A0A4X1SEN5 A0A4X1SFQ6 A0A4X1SGD0 A0A4X1T4E4 A0A4X1TI73 A0A4X1TLM6 A0A4X1TM21 A0A4X1TN45 A0A4X1TNF0 A0A4X1TTD0 A0A4X1TZH0 A0A4X1U1H8 A0A4X1U4G5 A0A4X1U637 A0A4X1UC71 A0A4X1UEG3 A0A4X1UM00 A0A4X1UVT8 A0A4X1V0Z9 A0A4X1VBX0 A0A4X1VHC5 A0A4X1VJ96 A0A4X1W415 A0A…	96	A0A286ZLJ1 A0A286ZU68 A0A286ZWZ5 A0A286ZXN6 A0A286ZZ97 A0A287A119 A0A287A143 A0A287A3Q5 A0A287AD55 A0A287ADJ6 A0A287AE36 A0A287AES5 A0A287AJT7 A0A287AMH2 A0A287ANI9 A0A287APR1 A0A287ASU4 A0A287AXJ7 A0A287B386 A0A287B5V1 A0A287B929 A0A287BHE7 A0A287BMZ6 A0A480I6X7 A0A480JIP6 A0A480JQM5 A0A480K0X2 A0A480K1F4 A0A480KRD0 A0A480KT22 A0A480T775 A0A480TJ23 A0A480VEZ3 A0A480VHU8 A0A480YLY2 A0A481D866 A0A…
GO:0044249	cellular biosynthetic process	BP	1.33654e-05	55	A0A286ZS25 A0A286ZY03 A0A286ZZT8 A0A287AE97 A0A287AEZ6 A0A287AP94 A0A287AUH8 A0A287BK33 A0A287BKF1 A0A480ERI8 A0A480L8C4 A0A480LVG3 A0A480V5L5 A0A481CVE5 A0A4X1SEN5 A0A4X1SFQ6 A0A4X1SGD0 A0A4X1T4E4 A0A4X1TI73 A0A4X1TLM6 A0A4X1TM21 A0A4X1TN45 A0A4X1TNF0 A0A4X1TTD0 A0A4X1TZH0 A0A4X1U1H8 A0A4X1U4G5 A0A4X1U637 A0A4X1UC71 A0A4X1UEG3 A0A4X1UM00 A0A4X1UVT8 A0A4X1V0Z9 A0A4X1VBX0 A0A4X1VHC5 A0A4X1VJ96 A0A…	93	A0A286ZLJ1 A0A286ZU68 A0A286ZWZ5 A0A286ZXN6 A0A286ZZ97 A0A287A119 A0A287A143 A0A287A3Q5 A0A287AD55 A0A287ADJ6 A0A287AE36 A0A287AJT7 A0A287AMH2 A0A287ANI9 A0A287APR1 A0A287ASU4 A0A287AXJ7 A0A287B386 A0A287B5V1 A0A287B929 A0A287BHE7 A0A287BMZ6 A0A480I6X7 A0A480JIP6 A0A480JQM5 A0A480K0X2 A0A480K1F4 A0A480KRD0 A0A480KT22 A0A480T775 A0A480TJ23 A0A480VEZ3 A0A480VHU8 A0A480YLY2 A0A481D866 A0A4X1SDD8 A0A…
GO:0009058	biosynthetic process	BP	1.33654e-05	59	A0A286ZNE7 A0A286ZS25 A0A286ZY03 A0A286ZZT8 A0A287AE97 A0A287AEZ6 A0A287AP94 A0A287AUH8 A0A287BK33 A0A287BKF1 A0A480ERI8 A0A480L8C4 A0A480LVG3 A0A480V5L5 A0A481CVE5 A0A4X1SEN5 A0A4X1SFQ6 A0A4X1SGD0 A0A4X1T4E4 A0A4X1TI73 A0A4X1TLM6 A0A4X1TM21 A0A4X1TN45 A0A4X1TNF0 A0A4X1TTD0 A0A4X1TZH0 A0A4X1U1H8 A0A4X1U4G5 A0A4X1U637 A0A4X1U8L3 A0A4X1UC71 A0A4X1UEG3 A0A4X1UM00 A0A4X1UVT8 A0A4X1V0Z9 A0A4X1VBX0 A0A…	99	A0A286ZLJ1 A0A286ZU68 A0A286ZWZ5 A0A286ZXN6 A0A286ZZ97 A0A287A119 A0A287A143 A0A287A3Q5 A0A287AD55 A0A287ADJ6 A0A287AE36 A0A287AES5 A0A287AJT7 A0A287AMH2 A0A287ANI9 A0A287APR1 A0A287ASU4 A0A287AXJ7 A0A287B386 A0A287B5V1 A0A287B929 A0A287BHE7 A0A287BMZ6 A0A480I6X7 A0A480JIP6 A0A480JQM5 A0A480K0X2 A0A480K1F4 A0A480KRD0 A0A480KT22 A0A480R857 A0A480T775 A0A480TJ23 A0A480VEZ3 A0A480VHU8 A0A480YLY2 A0A…
GO:1901564	organonitrogen compound metabolic process	BP	1.6331e-05	14	A0A287BKF1 A0A480QU32 A0A480V5L5 A0A4X1TZH0 A0A4X1U4G5 A0A4X1UHR2 A0A4X1VBX0 A0A4X1VS74 A0A4X1VWP5 A0A4X1W415 B3VKQ2 F1RXU4 K7GNB4 M3V806	96	A0A286ZLJ1 A0A286ZU68 A0A286ZVG0 A0A286ZWZ5 A0A287A119 A0A287A143 A0A287A3Q5 A0A287A7R4 A0A287AE36 A0A287AJT7 A0A287AM78 A0A287AN84 A0A287ANI9 A0A287APR1 A0A287ASU4 A0A287B386 A0A287B4J2 A0A287B5V1 A0A287B673 A0A287B929 A0A287BHE7 A0A287BMZ6 A0A287BQ72 A0A480I6X7 A0A480JIP6 A0A480K1F4 A0A480KRD0 A0A480T775 A0A480TJ23 A0A480VEZ3 A0A480VHU8 A0A480YLY2 A0A4X1SDD8 A0A4X1SK65 A0A4X1SP79 A0A4X1SPA3 A0A…
GO:0005198	structural molecule activity	MF	9.35417e-05	10	A0A480IFL7 A0A480KAI2 A0A4X1U9M6 A0A4X1UKW6 A0A4X1WBK2 B6EAV5 C3VPJ5 I3LNY6 P02550 Q8WNW3	56	A0A286ZLJ1 A0A286ZU68 A0A287A119 A0A287A143 A0A287AC34 A0A287AE36 A0A287AJT7 A0A287ANI9 A0A287APR1 A0A287ASU4 A0A287B386 A0A287B5V1 A0A287B929 A0A287BHE7 A0A287BMZ6 A0A480I6X7 A0A480KRD0 A0A480TJ23 A0A480VEZ3 A0A480VHU8 A0A480YLY2 A0A4X1SDD8 A0A4X1SK65 A0A4X1SWA8 A0A4X1T0T4 A0A4X1T326 A0A4X1T6D6 A0A4X1TBV3 A0A4X1TFR5 A0A4X1TPC2 A0A4X1TRI7 A0A4X1TV98 A0A4X1U3N9 A0A4X1UCV5 A0A4X1UDF8 A0A4X1ULB7 A0A…
GO:0044271	cellular nitrogen compound biosynthetic process	BP	9.8821e-05	28	A0A286ZS25 A0A286ZY03 A0A287AUH8 A0A287BK33 A0A287BKF1 A0A480ERI8 A0A480L8C4 A0A480LVG3 A0A480V5L5 A0A4X1SEN5 A0A4X1SGD0 A0A4X1TN45 A0A4X1TTD0 A0A4X1TZH0 A0A4X1U4G5 A0A4X1UC71 A0A4X1UM00 A0A4X1V0Z9 A0A4X1VBX0 B3VKQ2 F1RHL1 F1S2W1 F1S5B5 F1SJY0 F6PVF4 I3LJE5 J7FNA4 M3V837	80	A0A286ZLJ1 A0A286ZU68 A0A286ZWZ5 A0A286ZXN6 A0A286ZZ97 A0A287A119 A0A287A143 A0A287A3Q5 A0A287ADJ6 A0A287AE36 A0A287AJT7 A0A287AMH2 A0A287ANI9 A0A287APR1 A0A287ASU4 A0A287B386 A0A287B5V1 A0A287B929 A0A287BHE7 A0A287BMZ6 A0A480I6X7 A0A480JIP6 A0A480K1F4 A0A480KRD0 A0A480T775 A0A480TJ23 A0A480VEZ3 A0A480VHU8 A0A480YLY2 A0A4X1SDD8 A0A4X1SK65 A0A4X1SPA3 A0A4X1ST55 A0A4X1SWA8 A0A4X1T0T4 A0A4X1T326 A0A…
GO:1905368	peptidase complex	CC	0.00015639	3	A0A4X1SMS8 A0A4X1SPF4 A0A4X1VWP5	13	A0A286ZN52 A0A287AEH0 A0A287AT18 A0A480JRT9 A0A4X1T8R9 A0A4X1UYL6 A0A4X1V3T5 A0A4X1VZE2 A0A5G2QI19 A0A5G2QL81 A1XQU1 F1RXA7 F1SSL6
GO:1901566	organonitrogen compound biosynthetic process	BP	0.000380359	9	A0A287BKF1 A0A480V5L5 A0A4X1TZH0 A0A4X1U4G5 A0A4X1VBX0 A0A4X1W415 B3VKQ2 F1RXU4 K7GNB4	76	A0A286ZLJ1 A0A286ZU68 A0A286ZWZ5 A0A287A119 A0A287A143 A0A287A3Q5 A0A287AE36 A0A287AJT7 A0A287ANI9 A0A287APR1 A0A287ASU4 A0A287B386 A0A287B5V1 A0A287B929 A0A287BHE7 A0A287BMZ6 A0A480I6X7 A0A480JIP6 A0A480K1F4 A0A480KRD0 A0A480T775 A0A480TJ23 A0A480VEZ3 A0A480VHU8 A0A480YLY2 A0A4X1SDD8 A0A4X1SK65 A0A4X1SP79 A0A4X1SPA3 A0A4X1ST55 A0A4X1SWA8 A0A4X1T0T4 A0A4X1T326 A0A4X1T6D6 A0A4X1TBV3 A0A4X1TFR5 A0A…
GO:0000502	proteasome complex	CC	0.000575219	2	A0A4X1SMS8 A0A4X1SPF4	13	A0A286ZN52 A0A287AEH0 A0A287AT18 A0A480JRT9 A0A4X1T8R9 A0A4X1UYL6 A0A4X1V3T5 A0A4X1VZE2 A0A5G2QI19 A0A5G2QL81 A1XQU1 F1RXA7 F1SSL6
GO:0016020	membrane	CC	0.000585026	165	A0A286ZQV4 A0A287A328 A0A287A7G4 A0A287A9I6 A0A287AAP1 A0A287AE97 A0A287AGS1 A0A287AJA7 A0A287AL69 A0A287AN14 A0A287AND2 A0A287AP94 A0A287ASN8 A0A287AT82 A0A287AT86 A0A287AU37 A0A287AUN4 A0A287AY88 A0A287AYT7 A0A287B1B1 A0A287B7D7 A0A287B8M9 A0A287BIL5 A0A287BNF5 A0A287BPL8 A0A288CG62 A0A480EJY2 A0A480ITG5 A0A480J3H0 A0A480J4M0 A0A480JR30 A0A480KF33 A0A480MHD0 A0A480NGB4 A0A480QU32 A0A480UQ18 A0A…	34	A0A286ZZ97 A0A287A1U0 A0A287A519 A0A287A5V7 A0A287AHY2 A0A287B737 A0A287B7S6 A0A287B929 A0A287BAN5 A0A287BBR6 A0A287BPY3 A0A287BQA7 A0A480EL17 A0A480IMP9 A0A480IUJ2 A0A480LPQ0 A0A480QKY5 A0A4X1SEX9 A0A4X1SF55 A0A4X1TQE9 A0A4X1U0Z0 A0A4X1U7F4 A0A4X1U8E4 A0A4X1UGV2 A0A4X1VJV5 A0A4X1VUZ3 A0A4X1W229 A0A4X1W922 A0A5K1V0Y8 C6L2A6 D0G774 F1SQH7 P05027 Q8MIB3
GO:0009605	response to external stimulus	BP	0.000828767	17	A0A1S6QUX2 A0A287A8Q1 A0A287B0A1 A0A287BKF1 A0A4X1SEB3 A0A4X1T497 A0A4X1TTD0 A0A4X1UCD9 A0A4X1UKL3 A0A4X1V4K2 A0A4X1VBP3 A0A4X1VUD0 F1SM08 G8EGP8 K7GME6 Q29599 Q5MX78	1	A0A480XEL8
GO:0002376	immune system process	BP	0.000875981	34	A0A0A7BZQ2 A0A0F6N3R6 A0A1S6QUX2 A0A287A8Q1 A0A287AAP1 A0A287B0R8 A0A287BKF1 A0A3G5MUM7 A0A3G5MYP5 A0A480VMH3 A0A4X1SEB3 A0A4X1SEN5 A0A4X1SGD0 A0A4X1T497 A0A4X1T622 A0A4X1TNY1 A0A4X1TTD0 A0A4X1UCD9 A0A4X1UYW6 A0A4X1V9S3 A0A4X1VBP3 A0A4X1VRG0 A0A5G2QCN4 A0A5G2R7R1 A5D9J3 A7ISN8 G0KXP8 G8EGP8 K7GME6 O19194 Q29599 Q5DLX8 Q5MX78 Q8SQ34	0
GO:0006955	immune response	BP	0.00107481	29	A0A0A7BZQ2 A0A0F6N3R6 A0A1S6QUX2 A0A287A8Q1 A0A287AAP1 A0A287B0R8 A0A287BKF1 A0A3G5MUM7 A0A3G5MYP5 A0A480VMH3 A0A4X1SEB3 A0A4X1SEN5 A0A4X1SGD0 A0A4X1T497 A0A4X1T622 A0A4X1TTD0 A0A4X1V9S3 A0A4X1VRG0 A0A5G2QCN4 A0A5G2R7R1 A7ISN8 G0KXP8 G8EGP8 K7GME6 O19194 Q29599 Q5DLX8 Q5MX78 Q8SQ34	0
GO:0016021	integral component of membrane	CC	0.00139376	85	A0A286ZQV4 A0A287AE97 A0A287AGS1 A0A287AJA7 A0A287AL69 A0A287AND2 A0A287AP94 A0A287ASN8 A0A287AT86 A0A287AU37 A0A287AUN4 A0A287AY88 A0A287B8M9 A0A287BIL5 A0A287BNF5 A0A288CG62 A0A480EJY2 A0A480J4M0 A0A480JR30 A0A480MHD0 A0A480NGB4 A0A480UQ18 A0A480VW61 A0A480XWL8 A0A481ARM8 A0A481BNP0 A0A4X1SFQ6 A0A4X1SJQ4 A0A4X1SQZ0 A0A4X1SRH2 A0A4X1T4E4 A0A4X1TF72 A0A4X1TLM6 A0A4X1TMM9 A0A4X1TS57 A0A4X1TTY2 A0A…	22	A0A287A1U0 A0A287A5V7 A0A287B7S6 A0A287BAN5 A0A287BBR6 A0A287BPY3 A0A287BQA7 A0A480EL17 A0A480LPQ0 A0A480QKY5 A0A4X1SEX9 A0A4X1U7F4 A0A4X1UGV2 A0A4X1VUZ3 A0A4X1W229 A0A4X1W922 A0A5K1V0Y8 C6L2A6 D0G774 F1SQH7 P05027 Q8MIB3
GO:0016032	viral process	BP	0.00212406	12	A0A1S6QUX2 A0A287A0G8 A0A287A8Q1 A0A287BKF1 A0A4X1SEB3 A0A4X1T497 A0A4X1TTD0 A0A4X1UCD9 A0A4X1VX08 Q29599 Q5MX78 Q66X52	2	A0A480XEL8 A0A5G2QAR3
GO:0019882	antigen processing and presentation	BP	0.00267106	15	A0A0A7BZQ2 A0A0F6N3R6 A0A287AAP1 A0A287B0R8 A0A3G5MUM7 A0A3G5MYP5 A0A480VMH3 A0A4X1TNY1 A0A4X1UYW6 A0A5G2QCN4 A5D9J3 A7ISN8 G0KXP8 O19194 Q5DLX8	0
GO:0044710	single-organism metabolic process	BP	0.0042511	66	A0A286ZMH9 A0A286ZZT8 A0A287AE97 A0A287AP94 A0A287AUH8 A0A287BRP6 A0A480J4M0 A0A480J5N4 A0A480K9S0 A0A480V5L5 A0A480VJX3 A0A480W191 A0A480YQL4 A0A481CVE5 A0A4X1SFQ6 A0A4X1T4E4 A0A4X1TI73 A0A4X1TLM6 A0A4X1TM21 A0A4X1TZH0 A0A4X1U1H8 A0A4X1U4G5 A0A4X1U637 A0A4X1U7M1 A0A4X1U8L3 A0A4X1UC71 A0A4X1UEG3 A0A4X1UHR2 A0A4X1UTY3 A0A4X1UVT8 A0A4X1V5C3 A0A4X1V668 A0A4X1VHC5 A0A4X1VJ96 A0A4X1VLC0 A0A4X1VQX6 A0A…	89	A0A068F143 A0A0H4IV20 A0A286ZVG0 A0A286ZWZ5 A0A287A3Q5 A0A287A4Y2 A0A287A5G5 A0A287A5X0 A0A287A7R4 A0A287AES5 A0A287AM78 A0A287AN84 A0A287AXJ7 A0A287AZV4 A0A287B1V1 A0A287B4J2 A0A287B673 A0A287B6A4 A0A287BAZ8 A0A287BQ72 A0A480IXS3 A0A480IZT7 A0A480JIP6 A0A480K0X2 A0A480QMY9 A0A480R857 A0A480T775 A0A480W2D6 A0A480ZB64 A0A481AQ46 A0A481CLJ7 A0A4X1SM21 A0A4X1SPA3 A0A4X1SS08 A0A4X1ST55 A0A4X1T024 A0A…
GO:0044425	membrane part	CC	0.00645548	105	A0A286ZQV4 A0A287AE97 A0A287AGS1 A0A287AJA7 A0A287AL69 A0A287AND2 A0A287AP94 A0A287ASN8 A0A287AT86 A0A287AU37 A0A287AUN4 A0A287AY88 A0A287B7D7 A0A287B8M9 A0A287BIL5 A0A287BNF5 A0A288CG62 A0A480EJY2 A0A480J3H0 A0A480J4M0 A0A480JR30 A0A480MHD0 A0A480NGB4 A0A480UQ18 A0A480VMH3 A0A480VW61 A0A480XWL8 A0A480ZDX8 A0A481ARM8 A0A481BNP0 A0A4X1SFQ6 A0A4X1SGW5 A0A4X1SJQ4 A0A4X1SQZ0 A0A4X1SRH2 A0A4X1T4E4 A0A…	26	A0A286ZZ97 A0A287A1U0 A0A287A5V7 A0A287B7S6 A0A287BAN5 A0A287BBR6 A0A287BPY3 A0A287BQA7 A0A480EL17 A0A480LPQ0 A0A480QKY5 A0A4X1SEX9 A0A4X1SF55 A0A4X1U7F4 A0A4X1U8E4 A0A4X1UGV2 A0A4X1VJV5 A0A4X1VUZ3 A0A4X1W229 A0A4X1W922 A0A5K1V0Y8 C6L2A6 D0G774 F1SQH7 P05027 Q8MIB3
GO:0010467	gene expression	BP	0.007626	39	A0A286ZPJ7 A0A286ZS25 A0A287AMV5 A0A287AX25 A0A287BK33 A0A287BKF1 A0A480ERI8 A0A480L8C4 A0A480LVG3 A0A480QU32 A0A480TNH7 A0A481DBT9 A0A4X1SEN5 A0A4X1SGD0 A0A4X1SXC1 A0A4X1SY52 A0A4X1TN45 A0A4X1TTD0 A0A4X1TXE2 A0A4X1U6X7 A0A4X1UC71 A0A4X1UM00 A0A4X1V0Z9 A0A4X1V376 A0A4X1V914 A0A4X1V930 A0A4X1VWP5 B3VKQ2 F1RHL1 F1RSL5 F1S2W1 F1S5B5 F1SJY0 F6PVF4 I3LG02 I3LI59 I3LJE5 J7FNA4 M3V837	78	A0A286ZLJ1 A0A286ZU68 A0A286ZWZ5 A0A286ZX14 A0A286ZXN6 A0A286ZZ97 A0A287A119 A0A287A143 A0A287A3Q5 A0A287ADJ6 A0A287AE36 A0A287AJT7 A0A287AMH2 A0A287ANI9 A0A287APR1 A0A287ASU4 A0A287B386 A0A287B5V1 A0A287B929 A0A287BGP5 A0A287BHE7 A0A287BMZ6 A0A480I6X7 A0A480JIP6 A0A480KRD0 A0A480T775 A0A480TJ23 A0A480VEZ3 A0A480VHU8 A0A480XEL8 A0A480YLY2 A0A480Z524 A0A4X1SDD8 A0A4X1SK65 A0A4X1ST55 A0A4X1SWA8 A0A…
GO:1901575	organic substance catabolic process	BP	0.00883285	11	A0A286ZQN6 A0A287AMV5 A0A287BRP6 A0A480JD84 A0A480K9S0 A0A480W191 A0A4X1U7M1 A0A4X1UC71 A0A4X1UHR2 A0A4X1VS74 M3V806	30	A0A286ZMM6 A0A286ZN52 A0A287A7R4 A0A287AT18 A0A287B4J2 A0A288CG47 A0A480JRT9 A0A480Q2B2 A0A480QMY9 A0A480TS65 A0A4X1T024 A0A4X1TZP8 A0A4X1U350 A0A4X1UAI2 A0A4X1UGZ2 A0A4X1UYL6 A0A4X1V3T5 A0A4X1VH96 A0A4X1VTD9 A0A4X1VZE2 A0A4X1W6P8 A0A5G2QI19 A0A5G2QL81 A1XQU1 E7EI18 F1RXA7 F1SSL6 P32394 Q32YV9 Q8MIZ3
GO:0042555	MCM complex	CC	0.00883285	0		6	A0A287AD55 A0A480JQM5 A0A480KT22 A0A481D866 A0A5G2QHF3 F1RSE7
GO:0006614	SRP-dependent cotranslational protein targeting to membrane	BP	0.00883285	6	A0A4X1SJQ4 A0A4X1U2G4 A0A4X1US95 A0A5G2RH65 F1RW08 F2Z5M9	0
GO:0044248	cellular catabolic process	BP	0.0108197	9	A0A286ZQN6 A0A287AMV5 A0A287BRP6 A0A480JD84 A0A4X1U7M1 A0A4X1UC71 A0A4X1UHR2 A0A4X1VS74 M3V806	23	A0A286ZMM6 A0A286ZN52 A0A287AT18 A0A287B4J2 A0A288CG47 A0A480Q2B2 A0A480QMY9 A0A4X1T024 A0A4X1UAI2 A0A4X1UGZ2 A0A4X1UYL6 A0A4X1V3T5 A0A4X1VH96 A0A4X1VZE2 A0A4X1W6P8 A0A5G2QI19 A0A5G2QL81 A1XQU1 E7EI18 F1SSL6 P32394 Q32YV9 Q8MIZ3
GO:0009607	response to biotic stimulus	BP	0.0197861	12	A0A1S6QUX2 A0A287A8Q1 A0A287B0A1 A0A287BKF1 A0A480NGB4 A0A4X1SEB3 A0A4X1T497 A0A4X1TTD0 A0A4X1UCD9 F4ZS15 Q29599 Q5MX78	1	A0A480XEL8
GO:0006952	defense response	BP	0.022162	16	A0A1S6QUX2 A0A287A8Q1 A0A287BKF1 A0A4X1SEB3 A0A4X1SGD0 A0A4X1T497 A0A4X1TM21 A0A4X1TTD0 A0A4X1UCD9 A0A4X1URL0 A0A4X1VUD0 A0A5G2R7R1 F1S5B5 K7GME6 Q29599 Q5MX78	0
GO:0004497	monooxygenase activity	MF	0.0233639	6	A0A287AUH8 A0A480VJX3 A7L861 D0G6S0 I3LEX8 O97689	2	A0A0H4IV20 A0A4X1SM21
GO:0034641	cellular nitrogen compound metabolic process	BP	0.0324253	63	A0A286ZL06 A0A286ZPJ7 A0A286ZS25 A0A286ZY03 A0A287A1J1 A0A287AMV5 A0A287AUH8 A0A287AX25 A0A287B3P0 A0A287BFX9 A0A287BK33 A0A287BKF1 A0A287BTC2 A0A480ERI8 A0A480KJF3 A0A480L8C4 A0A480LVG3 A0A480QU32 A0A480TNH7 A0A480V5L5 A0A481DBT9 A0A4X1SEN5 A0A4X1SGD0 A0A4X1SHX9 A0A4X1SY52 A0A4X1T4T5 A0A4X1TN45 A0A4X1TNF0 A0A4X1TR88 A0A4X1TTD0 A0A4X1TXE2 A0A4X1TZH0 A0A4X1U4G5 A0A4X1U508 A0A4X1U6X7 A0A4X1U7M1 A0A…	116	A0A286ZHZ3 A0A286ZLJ1 A0A286ZQ79 A0A286ZQV9 A0A286ZU68 A0A286ZVC7 A0A286ZWZ5 A0A286ZX14 A0A286ZXN6 A0A286ZZ97 A0A287A119 A0A287A143 A0A287A3Q5 A0A287A7R4 A0A287A9R8 A0A287AD55 A0A287ADJ6 A0A287AE36 A0A287AJT7 A0A287AM78 A0A287AMH2 A0A287AN84 A0A287ANI9 A0A287APR1 A0A287ASU4 A0A287B386 A0A287B4J2 A0A287B5V1 A0A287B673 A0A287B929 A0A287BGP5 A0A287BHE7 A0A287BMZ6 A0A287BQ72 A0A480I6X7 A0A480JIP6 A0A…
GO:0030163	protein catabolic process	BP	0.0332951	3	A0A286ZQN6 A0A287BRP6 A0A480JD84	17	A0A286ZMM6 A0A286ZN52 A0A287AT18 A0A288CG47 A0A480JRT9 A0A480Q2B2 A0A4X1TZP8 A0A4X1UYL6 A0A4X1V3T5 A0A4X1VZE2 A0A4X1W6P8 A0A5G2QI19 A0A5G2QL81 A1XQU1 F1RXA7 F1SSL6 Q32YV9
GO:0044459	plasma membrane part	CC	0.034358	12	A0A480VMH3 A0A481ARM8 A0A4X1V9S3 A0A4X1VBP3 A0A4X1WDD8 A0A5G2QCN4 A7ISN8 I3LQ25 K9J6J2 Q5DLX8 Q8SQ34 Q8WNW3	9	A0A286ZZ97 A0A287BAN5 A0A480EL17 A0A480LPQ0 A0A480QKY5 A0A4X1SF55 A0A4X1W922 A0A5K1V0Y8 P05027
GO:0006807	nitrogen compound metabolic process	BP	0.034358	66	A0A286ZL06 A0A286ZPJ7 A0A286ZS25 A0A286ZY03 A0A287A1J1 A0A287AMV5 A0A287AUH8 A0A287AX25 A0A287B3P0 A0A287BFX9 A0A287BK33 A0A287BKF1 A0A287BTC2 A0A480ERI8 A0A480KJF3 A0A480L8C4 A0A480LVG3 A0A480QU32 A0A480TNH7 A0A480V5L5 A0A481DBT9 A0A4X1SEN5 A0A4X1SGD0 A0A4X1SHX9 A0A4X1SY52 A0A4X1T4T5 A0A4X1TN45 A0A4X1TNF0 A0A4X1TR88 A0A4X1TTD0 A0A4X1TXE2 A0A4X1TZH0 A0A4X1U4G5 A0A4X1U508 A0A4X1U6X7 A0A4X1U7M1 A0A…	124	A0A286ZHZ3 A0A286ZLJ1 A0A286ZQ79 A0A286ZQV9 A0A286ZU68 A0A286ZVC7 A0A286ZVG0 A0A286ZWZ5 A0A286ZX14 A0A286ZXN6 A0A286ZZ97 A0A287A119 A0A287A143 A0A287A3Q5 A0A287A7R4 A0A287A9R8 A0A287AD55 A0A287ADJ6 A0A287AE36 A0A287AJT7 A0A287AM78 A0A287AMH2 A0A287AN84 A0A287ANI9 A0A287APR1 A0A287ASU4 A0A287B386 A0A287B4J2 A0A287B5V1 A0A287B673 A0A287B929 A0A287BGP5 A0A287BHE7 A0A287BMZ6 A0A287BQ72 A0A480I6X7 A0A…
GO:0051707	response to other organism	BP	0.034358	10	A0A1S6QUX2 A0A287A8Q1 A0A287B0A1 A0A287BKF1 A0A4X1SEB3 A0A4X1T497 A0A4X1TTD0 A0A4X1UCD9 Q29599 Q5MX78	1	A0A480XEL8
GO:0042611	MHC protein complex	CC	0.034358	5	A0A480VMH3 A0A4X1V9S3 A0A5G2QCN4 A7ISN8 Q5DLX8	0
GO:0009615	response to virus	BP	0.0362271	9	A0A1S6QUX2 A0A287A8Q1 A0A287BKF1 A0A4X1SEB3 A0A4X1T497 A0A4X1TTD0 A0A4X1UCD9 Q29599 Q5MX78	1	A0A480XEL8
GO:0005886	plasma membrane	CC	0.0429943	14	A0A480VMH3 A0A481ARM8 A0A4X1TWN8 A0A4X1UH51 A0A4X1V9S3 A0A4X1VBP3 A0A4X1WDD8 A0A5G2QCN4 A7ISN8 I3LQ25 K9J6J2 Q5DLX8 Q8SQ34 Q8WNW3	10	A0A286ZZ97 A0A287B737 A0A287BAN5 A0A480EL17 A0A480LPQ0 A0A480QKY5 A0A4X1SF55 A0A4X1W922 A0A5K1V0Y8 P05027
GO:0005975	carbohydrate metabolic process	BP	0.0491948	7	A0A287BG16 A0A4X1T247 A0A5G2QG83 A0A5G2QGR7 A0A5G2RK37 F1SNW8 K7N7E7	26	A0A287A7R4 A0A287A7V3 A0A287AES5 A0A287AXJ7 A0A287B1C9 A0A287BQ72 A0A480IXS3 A0A480QMY9 A0A480QT32 A0A4X1SEW9 A0A4X1TLF7 A0A4X1U350 A0A4X1UDU6 A0A4X1V5H0 A0A4X1VJV9 A0A4X1VTD9 A0A4X1VXR8 A0A4X1W3P2 A0A4X1W6B2 A0A5G2R0E8 A0A5G2R599 D0G780 F1RIP1 K7GND0 Q4FAT7 Q9GKX6
GO:0043232	intracellular non-membrane-bounded organelle	CC	0.049784	30	A0A287B3P0 A0A287B9C3 A0A287BFX9 A0A287BL20 A0A480IFL7 A0A480KAI2 A0A480PJ61 A0A481CN06 A0A481DBT9 A0A4X1SDG3 A0A4X1SHX9 A0A4X1SJ96 A0A4X1STD9 A0A4X1T622 A0A4X1TR88 A0A4X1TVP3 A0A4X1U508 A0A4X1U6X7 A0A4X1U9M6 A0A4X1UW28 A0A4X1VBP3 A0A4X1VPQ0 A0A4X1WBK2 A0A5G2QDV6 F1SH89 F2Z5L6 I3L5I4 I3LNY6 P02550 P06348	73	A0A286ZLJ1 A0A286ZU68 A0A287A119 A0A287A143 A0A287AC34 A0A287AE36 A0A287AHW3 A0A287AJT7 A0A287ANI9 A0A287APR1 A0A287ASU4 A0A287B386 A0A287B5V1 A0A287B929 A0A287BHE7 A0A287BMZ6 A0A287BSZ9 A0A480I6X7 A0A480ITF4 A0A480KRD0 A0A480Q1X5 A0A480TJ23 A0A480VEZ3 A0A480VHU8 A0A480YLY2 A0A4X1SDD8 A0A4X1SK65 A0A4X1SWA8 A0A4X1T0T4 A0A4X1T326 A0A4X1T5Q3 A0A4X1T6D6 A0A4X1T7V0 A0A4X1T9P0 A0A4X1TBV3 A0A4X1TEQ8 A0A…

## Sheet: Sheet3
GO_ID	GO_Term	GO_Class	Adjusted P value（q value）	Up（n）	IDs(up)	Down(n)	IDs(down)
GO:0005840	ribosome	CC	8.01331e-32	0		74	A0A140UHW4 A0A286ZJJ6 A0A286ZLJ1 A0A286ZU68 A0A287A119 A0A287A143 A0A287AE36 A0A287AEW3 A0A287AJT7 A0A287ANI9 A0A287AR81 A0A287B386 A0A287B5V1 A0A287B929 A0A287BHE7 A0A287BIV6 A0A287BMZ6 A0A287BP93 A0A480I6X7 A0A480JJI1 A0A480JTD7 A0A480KRD0 A0A480QIM3 A0A480TJ23 A0A480VHU8 A0A480YLY2 A0A4X1SDD8 A0A4X1SJF4 A0A4X1SK65 A0A4X1SLE5 A0A4X1SWA8 A0A4X1T0T4 A0A4X1T326 A0A4X1T3C0 A0A4X1TBV3 A0A4X1TFR5 A0A…
GO:0003735	structural constituent of ribosome	MF	6.31145e-29	0		70	A0A140UHW4 A0A286ZJJ6 A0A286ZLJ1 A0A286ZU68 A0A287A119 A0A287A143 A0A287AE36 A0A287AEW3 A0A287AJT7 A0A287ANI9 A0A287AR81 A0A287AVS9 A0A287B386 A0A287B5V1 A0A287B929 A0A287BHE7 A0A287BIV6 A0A287BMZ6 A0A480I6X7 A0A480JJI1 A0A480JTD7 A0A480KRD0 A0A480QIM3 A0A480TJ23 A0A480VHU8 A0A480YLY2 A0A4X1SDD8 A0A4X1SJF4 A0A4X1SK65 A0A4X1SWA8 A0A4X1T0T4 A0A4X1T326 A0A4X1T3C0 A0A4X1TBV3 A0A4X1TFR5 A0A4X1TPC2 A0A…
GO:0030529	intracellular ribonucleoprotein complex	CC	6.03927e-24	3	A0A4X1U2G4 A0A4X1VB17 F2Z5M9	76	A0A140UHW4 A0A286ZJJ6 A0A286ZLJ1 A0A286ZU68 A0A287A119 A0A287A143 A0A287AE36 A0A287AEW3 A0A287AJT7 A0A287ANI9 A0A287AR81 A0A287B386 A0A287B5V1 A0A287B929 A0A287BHE7 A0A287BIV6 A0A287BMZ6 A0A287BP93 A0A480I6X7 A0A480JJI1 A0A480JTD7 A0A480KRD0 A0A480QIM3 A0A480TJ23 A0A480VHU8 A0A480YLY2 A0A4X1SDD8 A0A4X1SJF4 A0A4X1SK65 A0A4X1SLE5 A0A4X1SWA8 A0A4X1T0T4 A0A4X1T326 A0A4X1T3C0 A0A4X1T4U8 A0A4X1TBV3 A0A…
GO:0005198	structural molecule activity	MF	3.71639e-18	14	A0A286ZPT0 A0A287AZ37 A0A480IV89 A0A480M4R9 A0A480PYP5 A0A480THM2 A0A4X1U9M6 A0A4X1UKW6 A0A4X1WBK2 A0A5G2QHU0 F1RYV9 F1S982 F2Z5B2 P02550	74	A0A140UHW4 A0A286ZJJ6 A0A286ZLJ1 A0A286ZU68 A0A287A119 A0A287A143 A0A287AE36 A0A287AEW3 A0A287AJT7 A0A287ANI9 A0A287AR81 A0A287AVS9 A0A287B386 A0A287B5V1 A0A287B929 A0A287BFZ2 A0A287BHE7 A0A287BIV6 A0A287BMZ6 A0A480I6X7 A0A480JJI1 A0A480JTD7 A0A480KRD0 A0A480QIM3 A0A480TJ23 A0A480VHU8 A0A480VRY6 A0A480YLY2 A0A480ZZB1 A0A4X1SDD8 A0A4X1SJF4 A0A4X1SK65 A0A4X1SWA8 A0A4X1T0T4 A0A4X1T326 A0A4X1T3C0 A0A…
GO:0006412	translation	BP	1.91615e-12	3	A0A287BKF1 A0A5G2QIG8 B3VKQ2	74	A0A140UHW4 A0A286ZJJ6 A0A286ZLJ1 A0A286ZU68 A0A286ZWZ5 A0A287A119 A0A287A143 A0A287AE36 A0A287AEW3 A0A287AJT7 A0A287ANI9 A0A287AS73 A0A287B386 A0A287B5V1 A0A287B929 A0A287BHE7 A0A287BIV6 A0A287BMZ6 A0A480I6X7 A0A480JJI1 A0A480JTD7 A0A480KRD0 A0A480QIM3 A0A480TJ23 A0A480VHU8 A0A480YLY2 A0A4X1SDD8 A0A4X1SJF4 A0A4X1SK65 A0A4X1SWA8 A0A4X1T0T4 A0A4X1T326 A0A4X1T3C0 A0A4X1TBV3 A0A4X1TFR5 A0A4X1TPC2 A0A…
GO:0006518	peptide metabolic process	BP	1.07642e-11	5	A0A287BKF1 A0A480QU32 A0A4X1VWP5 A0A5G2QIG8 B3VKQ2	74	A0A140UHW4 A0A286ZJJ6 A0A286ZLJ1 A0A286ZU68 A0A286ZWZ5 A0A287A119 A0A287A143 A0A287AE36 A0A287AEW3 A0A287AJT7 A0A287ANI9 A0A287AS73 A0A287B386 A0A287B5V1 A0A287B929 A0A287BHE7 A0A287BIV6 A0A287BMZ6 A0A480I6X7 A0A480JJI1 A0A480JTD7 A0A480KRD0 A0A480QIM3 A0A480TJ23 A0A480VHU8 A0A480YLY2 A0A4X1SDD8 A0A4X1SJF4 A0A4X1SK65 A0A4X1SWA8 A0A4X1T0T4 A0A4X1T326 A0A4X1T3C0 A0A4X1TBV3 A0A4X1TFR5 A0A4X1TPC2 A0A…
GO:0043603	cellular amide metabolic process	BP	1.11311e-11	6	A0A287BKF1 A0A480QU32 A0A4X1VWP5 A0A4X1W415 A0A5G2QIG8 B3VKQ2	75	A0A140UHW4 A0A286ZJJ6 A0A286ZLJ1 A0A286ZU68 A0A286ZWZ5 A0A287A119 A0A287A143 A0A287AE36 A0A287AEW3 A0A287AJT7 A0A287ANI9 A0A287AS73 A0A287B386 A0A287B5V1 A0A287B929 A0A287BHE7 A0A287BIV6 A0A287BMZ6 A0A480I6X7 A0A480JJI1 A0A480JTD7 A0A480KRD0 A0A480QIM3 A0A480TJ23 A0A480VHU8 A0A480YLY2 A0A4X1SDD8 A0A4X1SJF4 A0A4X1SK65 A0A4X1SWA8 A0A4X1T024 A0A4X1T0T4 A0A4X1T326 A0A4X1T3C0 A0A4X1TBV3 A0A4X1TFR5 A0A…
GO:0043232	intracellular non-membrane-bounded organelle	CC	3.22135e-09	34	A0A286ZPE5 A0A287A8S7 A0A287AZ37 A0A287B6W3 A0A287B9C3 A0A287BFX9 A0A287BL20 A0A480ERX5 A0A480IV89 A0A480PNR4 A0A480PQZ4 A0A480S714 A0A480THM2 A0A480UP67 A0A480VZY0 A0A481CN06 A0A4X1SDG3 A0A4X1SHX9 A0A4X1U9M6 A0A4X1V3P1 A0A4X1V6X5 A0A4X1V6Y6 A0A4X1VBP3 A0A4X1VEJ6 A0A4X1VJS3 A0A4X1VPQ0 A0A4X1WBK2 A0A5G2QDV6 A0A5G2RC84 F1RYV9 F2Z5B2 I3L5I4 P02550 P06348	93	A0A140UHW4 A0A286ZJJ6 A0A286ZLJ1 A0A286ZU68 A0A287A119 A0A287A143 A0A287AE36 A0A287AEW3 A0A287AHW3 A0A287AJT7 A0A287ANI9 A0A287AR81 A0A287B386 A0A287B5V1 A0A287B929 A0A287BFZ2 A0A287BHE7 A0A287BIV6 A0A287BMZ6 A0A287BP93 A0A480I6X7 A0A480JJI1 A0A480JTD7 A0A480KRD0 A0A480MN39 A0A480Q1X5 A0A480QIM3 A0A480TJ23 A0A480VHU8 A0A480VQ51 A0A480VRY6 A0A480W754 A0A480YLY2 A0A480ZZB1 A0A4X1SDD8 A0A4X1SJF4 A0A…
GO:1901566	organonitrogen compound biosynthetic process	BP	6.61437e-06	11	A0A287B3Y5 A0A287BKF1 A0A480KDK7 A0A4X1T3P5 A0A4X1U4G5 A0A4X1V0A0 A0A4X1VBX0 A0A4X1W415 A0A5G2QIG8 B3VKQ2 P80230	77	A0A140UHW4 A0A286ZJJ6 A0A286ZLJ1 A0A286ZU68 A0A286ZWZ5 A0A287A119 A0A287A143 A0A287AE36 A0A287AEW3 A0A287AJT7 A0A287ANI9 A0A287AS73 A0A287B386 A0A287B5V1 A0A287B929 A0A287BHE7 A0A287BIV6 A0A287BMZ6 A0A480I6X7 A0A480JJI1 A0A480JTD7 A0A480KRD0 A0A480QIM3 A0A480TJ23 A0A480VHU8 A0A480YLY2 A0A4X1SDD8 A0A4X1SJF4 A0A4X1SK65 A0A4X1SP79 A0A4X1SWA8 A0A4X1T0T4 A0A4X1T326 A0A4X1T3C0 A0A4X1TBV3 A0A4X1TFR5 A0A…
GO:1901564	organonitrogen compound metabolic process	BP	7.58278e-06	17	A0A287B3Y5 A0A287BKF1 A0A480K104 A0A480KDK7 A0A480QU32 A0A4X1T3P5 A0A4X1U4G5 A0A4X1V0A0 A0A4X1V0N3 A0A4X1VBX0 A0A4X1VWP5 A0A4X1W415 A0A5G2QIG8 B3VKQ2 F1RTA3 M3V806 P80230	91	A0A140UHW4 A0A286ZJJ6 A0A286ZLJ1 A0A286ZU68 A0A286ZVG0 A0A286ZWZ5 A0A287A119 A0A287A143 A0A287AE36 A0A287AEW3 A0A287AJT7 A0A287ANI9 A0A287AS73 A0A287B386 A0A287B5V1 A0A287B929 A0A287BHE7 A0A287BIV6 A0A287BMZ6 A0A480I6X7 A0A480JJI1 A0A480JTD7 A0A480KRD0 A0A480QIM3 A0A480RXA2 A0A480TJ23 A0A480VHU8 A0A480YLY2 A0A4X1SDD8 A0A4X1SJF4 A0A4X1SK65 A0A4X1SP79 A0A4X1SS08 A0A4X1SWA8 A0A4X1T024 A0A4X1T0T4 A0A…
GO:0044444	cytoplasmic part	CC	2.36412e-05	35	A0A286ZPE5 A0A286ZPT0 A0A287AGS1 A0A287AZQ5 A0A480ITG5 A0A480J3H0 A0A480M4R9 A0A480MHD0 A0A480PYP5 A0A480S714 A0A481BYC3 A0A4X1SQ23 A0A4X1SRG9 A0A4X1T7E7 A0A4X1TNY1 A0A4X1TRW9 A0A4X1U2G4 A0A4X1UHC3 A0A4X1UYW6 A0A4X1V2X3 A0A4X1VJM0 A0A4X1VWP5 A0A4X1W415 A0A5G2QG83 A0A5G2QHU0 A0A5G2R7N1 A0A5G2RDS9 A0A5G2RH65 A5D9J3 F1S982 F1SBH2 F1SBR2 F2Z5M9 I3LGX9 Q7YS99	97	A0A140UHW4 A0A286ZJJ6 A0A286ZLJ1 A0A286ZU68 A0A286ZVG0 A0A287A119 A0A287A143 A0A287AE36 A0A287AEW3 A0A287AJT7 A0A287ANF8 A0A287ANI9 A0A287AR81 A0A287AVS9 A0A287B386 A0A287B5V1 A0A287B8Y9 A0A287B929 A0A287BHE7 A0A287BIV6 A0A287BKR6 A0A287BMZ6 A0A287BP93 A0A480I6X7 A0A480IMP9 A0A480JJI1 A0A480JTD7 A0A480KRD0 A0A480LW62 A0A480M5F4 A0A480QIM3 A0A480TJ23 A0A480VHU8 A0A480YLY2 A0A4X1SDD8 A0A4X1SJF4 A0A…
GO:0044459	plasma membrane part	CC	0.000147535	8	A0A480VMH3 A0A481ARM8 A0A4X1V9S3 A0A4X1VBP3 A0A5G2QCN4 A7ISN8 Q5DLX8 Q8SQ34	17	A0A286ZZ97 A0A287AZ66 A0A287BAN5 A0A287BBR1 A0A480E4T9 A0A480EL17 A0A480HD92 A0A480IQI2 A0A480LPQ0 A0A480QKY5 A0A480Y2R6 A0A4X1SF55 A0A4X1W922 A0A5K1V0Y8 B2CZF5 G8GCE6 P05027
GO:0034645	cellular macromolecule biosynthetic process	BP	0.000312634	28	A0A286ZS25 A0A286ZY03 A0A286ZZT8 A0A287BK33 A0A287BKF1 A0A480ERI8 A0A480JVL0 A0A480KQ60 A0A480LVG3 A0A4X1T4E4 A0A4X1TI73 A0A4X1TNF0 A0A4X1UC71 A0A4X1UEG3 A0A4X1UEV0 A0A4X1UUZ0 A0A4X1V6Y6 A0A5G2QD74 A0A5G2QIG8 B3VKQ2 F1S2W1 F1S937 F6PVF4 I3LJE5 I3LU42 J7FNA4 M3V837 Q0KKC2	78	A0A140UHW4 A0A286ZJJ6 A0A286ZLJ1 A0A286ZU68 A0A286ZWZ5 A0A286ZZ97 A0A287A0V1 A0A287A119 A0A287A143 A0A287AE36 A0A287AEW3 A0A287AJT7 A0A287ANI9 A0A287AS73 A0A287B386 A0A287B5V1 A0A287B929 A0A287BHE7 A0A287BIV6 A0A287BMZ6 A0A480I6X7 A0A480JJI1 A0A480JTD7 A0A480KRD0 A0A480QIM3 A0A480TJ23 A0A480VHU8 A0A480YLY2 A0A4X1SDD8 A0A4X1SJF4 A0A4X1SK65 A0A4X1SWA8 A0A4X1T0T4 A0A4X1T326 A0A4X1T3C0 A0A4X1T3Z8 A0A…
GO:0044271	cellular nitrogen compound biosynthetic process	BP	0.000348645	24	A0A286ZS25 A0A286ZY03 A0A287AUH8 A0A287B3Y5 A0A287BK33 A0A287BKF1 A0A480ERI8 A0A480JVL0 A0A480KDK7 A0A480LVG3 A0A4X1T3P5 A0A4X1U4G5 A0A4X1UC71 A0A4X1UEV0 A0A4X1V0A0 A0A4X1VBX0 A0A5G2QIG8 B3VKQ2 F1S2W1 F6PVF4 I3LJE5 J7FNA4 M3V837 P80230	79	A0A140UHW4 A0A286ZJJ6 A0A286ZLJ1 A0A286ZU68 A0A286ZWZ5 A0A286ZZ97 A0A287A119 A0A287A143 A0A287AE36 A0A287AEW3 A0A287AJT7 A0A287ANI9 A0A287AS73 A0A287B386 A0A287B5V1 A0A287B929 A0A287BHE7 A0A287BIV6 A0A287BMZ6 A0A480I6X7 A0A480JJI1 A0A480JTD7 A0A480KRD0 A0A480QIM3 A0A480TJ23 A0A480VHU8 A0A480YLY2 A0A4X1SDD8 A0A4X1SJF4 A0A4X1SK65 A0A4X1SWA8 A0A4X1T0T4 A0A4X1T326 A0A4X1T3C0 A0A4X1TBV3 A0A4X1TFR5 A0A…
GO:0009059	macromolecule biosynthetic process	BP	0.000382592	29	A0A286ZS25 A0A286ZY03 A0A286ZZT8 A0A287BK33 A0A287BKF1 A0A480ERI8 A0A480JVL0 A0A480KQ60 A0A480LVG3 A0A4X1T4E4 A0A4X1TI73 A0A4X1TNF0 A0A4X1UC71 A0A4X1UEG3 A0A4X1UEV0 A0A4X1UUZ0 A0A4X1V6Y6 A0A4X1W415 A0A5G2QD74 A0A5G2QIG8 B3VKQ2 F1S2W1 F1S937 F6PVF4 I3LJE5 I3LU42 J7FNA4 M3V837 Q0KKC2	78	A0A140UHW4 A0A286ZJJ6 A0A286ZLJ1 A0A286ZU68 A0A286ZWZ5 A0A286ZZ97 A0A287A0V1 A0A287A119 A0A287A143 A0A287AE36 A0A287AEW3 A0A287AJT7 A0A287ANI9 A0A287AS73 A0A287B386 A0A287B5V1 A0A287B929 A0A287BHE7 A0A287BIV6 A0A287BMZ6 A0A480I6X7 A0A480JJI1 A0A480JTD7 A0A480KRD0 A0A480QIM3 A0A480TJ23 A0A480VHU8 A0A480YLY2 A0A4X1SDD8 A0A4X1SJF4 A0A4X1SK65 A0A4X1SWA8 A0A4X1T0T4 A0A4X1T326 A0A4X1T3C0 A0A4X1T3Z8 A0A…
GO:0044391	ribosomal subunit	CC	0.00532135	0		9	A0A287AR81 A0A287B386 A0A4X1T326 A0A4X1UCV5 A0A4X1W4F3 A0A5G2QLT3 F1S8A5 F2Z5E6 I3LTC4
GO:0005886	plasma membrane	CC	0.00560315	8	A0A480VMH3 A0A481ARM8 A0A4X1V9S3 A0A4X1VBP3 A0A5G2QCN4 A7ISN8 Q5DLX8 Q8SQ34	18	A0A286ZZ97 A0A287AZ66 A0A287B737 A0A287BAN5 A0A287BBR1 A0A480E4T9 A0A480EL17 A0A480HD92 A0A480IQI2 A0A480LPQ0 A0A480QKY5 A0A480Y2R6 A0A4X1SF55 A0A4X1W922 A0A5K1V0Y8 B2CZF5 G8GCE6 P05027
GO:0032991	macromolecular complex	CC	0.00644819	58	A0A286ZPT0 A0A287A8S7 A0A287AZQ5 A0A287B6W3 A0A287BFX9 A0A287BKG3 A0A480M4R9 A0A480NEM1 A0A480PYP5 A0A480S714 A0A480UP67 A0A480VMH3 A0A480W485 A0A480XU78 A0A481ARM8 A0A481CTQ7 A0A4X1SHF0 A0A4X1SHX9 A0A4X1SMS8 A0A4X1SPF4 A0A4X1SQ23 A0A4X1SRG9 A0A4X1STY9 A0A4X1SV64 A0A4X1T5W4 A0A4X1T7E7 A0A4X1TVB1 A0A4X1TVD6 A0A4X1TXY0 A0A4X1U2G4 A0A4X1UP60 A0A4X1UYW6 A0A4X1V1W5 A0A4X1V2X3 A0A4X1V3P1 A0A4X1V6Y6 A0A…	109	A0A140UHW4 A0A286ZJJ6 A0A286ZLJ1 A0A286ZN52 A0A286ZU68 A0A286ZYE5 A0A287A119 A0A287A143 A0A287A5E8 A0A287A923 A0A287AE36 A0A287AEW3 A0A287AJT7 A0A287AL20 A0A287ANI9 A0A287AR81 A0A287AS73 A0A287AZ66 A0A287B386 A0A287B5V1 A0A287B8Y9 A0A287B929 A0A287BAN5 A0A287BBR1 A0A287BHE7 A0A287BIV6 A0A287BMZ6 A0A287BP93 A0A480E4T9 A0A480HD92 A0A480I6X7 A0A480IQI2 A0A480JJI1 A0A480JTD7 A0A480KRD0 A0A480QIM3 A0A…
GO:0098797	plasma membrane protein complex	CC	0.0077404	6	A0A480VMH3 A0A481ARM8 A0A4X1V9S3 A0A5G2QCN4 A7ISN8 Q5DLX8	9	A0A287AZ66 A0A287BAN5 A0A287BBR1 A0A480E4T9 A0A480HD92 A0A480IQI2 A0A480QKY5 A0A480Y2R6 P05027
GO:0005737	cytoplasm	CC	0.00803227	51	A0A286ZPE5 A0A286ZPT0 A0A286ZS25 A0A287A8W6 A0A287AGS1 A0A287AZQ5 A0A480ERI8 A0A480ITG5 A0A480J3H0 A0A480J4M0 A0A480JWC6 A0A480M4R9 A0A480MHD0 A0A480PYP5 A0A480S714 A0A481BVY7 A0A481BYC3 A0A4X1SQ23 A0A4X1SQB0 A0A4X1SRG9 A0A4X1T7E7 A0A4X1TNY1 A0A4X1TRW9 A0A4X1U2G4 A0A4X1UDN2 A0A4X1UHC3 A0A4X1UYW6 A0A4X1V0N3 A0A4X1V2X3 A0A4X1V5C3 A0A4X1V969 A0A4X1VJM0 A0A4X1VWP5 A0A4X1W415 A0A4X1W988 A0A4X1WBL8 A0A…	104	A0A140UHW4 A0A286ZJJ6 A0A286ZLJ1 A0A286ZU68 A0A286ZVG0 A0A287A119 A0A287A143 A0A287AE36 A0A287AEW3 A0A287AJT7 A0A287ANF8 A0A287ANI9 A0A287AR81 A0A287AVS9 A0A287B386 A0A287B5V1 A0A287B8Y9 A0A287B929 A0A287BFZ2 A0A287BHE7 A0A287BIV6 A0A287BKR6 A0A287BMZ6 A0A287BP93 A0A480I6X7 A0A480IMP9 A0A480JJI1 A0A480JTD7 A0A480KRD0 A0A480LW62 A0A480M5F4 A0A480QIM3 A0A480TJ23 A0A480VHU8 A0A480W754 A0A480YLY2 A0A…
GO:0030126	COPI vesicle coat	CC	0.0115838	5	A0A480M4R9 A0A480PYP5 A0A4X1SQ23 A0A5G2QHU0 F1S982	0
GO:0015934	large ribosomal subunit	CC	0.0115838	0		6	A0A287B386 A0A4X1T326 A0A4X1UCV5 A0A4X1W4F3 A0A5G2QLT3 I3LTC4
GO:0005761	mitochondrial ribosome	CC	0.0115838	0		6	A0A287AR81 A0A287BP93 A0A4X1USF0 F1S8A5 F1SGC7 F1SU49
GO:0010467	gene expression	BP	0.0137854	26	A0A286ZPJ7 A0A286ZS25 A0A287AX25 A0A287BK33 A0A287BKF1 A0A287BKG3 A0A480EF58 A0A480ERI8 A0A480JVL0 A0A480LVG3 A0A480QU32 A0A4X1SY52 A0A4X1UC71 A0A4X1UCH8 A0A4X1UEV0 A0A4X1V376 A0A4X1VWP5 A0A5G2QIG8 B3VKQ2 F1RSL5 F1S2W1 F6PVF4 I3LI59 I3LJE5 J7FNA4 M3V837	87	A0A140UHW4 A0A286ZJJ6 A0A286ZLJ1 A0A286ZU68 A0A286ZWZ5 A0A286ZZ97 A0A287A119 A0A287A143 A0A287AE36 A0A287AEW3 A0A287AJT7 A0A287ANI9 A0A287AS73 A0A287B386 A0A287B5V1 A0A287B929 A0A287BHE7 A0A287BIV6 A0A287BMZ6 A0A287BQP1 A0A480I6X7 A0A480JJI1 A0A480JTD7 A0A480KRD0 A0A480MTN6 A0A480QIM3 A0A480TJ23 A0A480VHU8 A0A480XEL8 A0A480YLY2 A0A4X1SDD8 A0A4X1SJF4 A0A4X1SK65 A0A4X1SWA8 A0A4X1T0T4 A0A4X1T326 A0A…
GO:1901576	organic substance biosynthetic process	BP	0.0137854	44	A0A286ZS25 A0A286ZY03 A0A286ZZT8 A0A287B3Y5 A0A287BK33 A0A287BKF1 A0A480ERI8 A0A480JVL0 A0A480KDK7 A0A480KQ60 A0A480LVG3 A0A480V2S8 A0A481CVE5 A0A4X1T3P5 A0A4X1T4E4 A0A4X1TI73 A0A4X1TM21 A0A4X1TNF0 A0A4X1U4G5 A0A4X1U637 A0A4X1UC71 A0A4X1UEG3 A0A4X1UEV0 A0A4X1UUZ0 A0A4X1V0A0 A0A4X1V6Y6 A0A4X1VBX0 A0A4X1VJ96 A0A4X1W415 A0A5G2QD74 A0A5G2QG83 A0A5G2QIG8 B3VKQ2 F1S2D0 F1S2W1 F1S937 F1SMG8 F6PVF4 I3LJE…	87	A0A140UHW4 A0A286ZJJ6 A0A286ZLJ1 A0A286ZU68 A0A286ZWZ5 A0A286ZZ97 A0A287A0V1 A0A287A119 A0A287A143 A0A287AE36 A0A287AES5 A0A287AEW3 A0A287AJT7 A0A287ANI9 A0A287AS73 A0A287B386 A0A287B5V1 A0A287B929 A0A287BHE7 A0A287BIV6 A0A287BMZ6 A0A480I6X7 A0A480JJI1 A0A480JTD7 A0A480KRD0 A0A480QIM3 A0A480TJ23 A0A480VHU8 A0A480YLY2 A0A4X1SDD8 A0A4X1SJF4 A0A4X1SK65 A0A4X1SP79 A0A4X1SWA8 A0A4X1T0T4 A0A4X1T326 A0A…
GO:0044249	cellular biosynthetic process	BP	0.0172382	43	A0A286ZS25 A0A286ZY03 A0A286ZZT8 A0A287AUH8 A0A287B3Y5 A0A287BK33 A0A287BKF1 A0A480ERI8 A0A480JVL0 A0A480KDK7 A0A480KQ60 A0A480LVG3 A0A481CVE5 A0A4X1T3P5 A0A4X1T4E4 A0A4X1TI73 A0A4X1TM21 A0A4X1TNF0 A0A4X1TRW2 A0A4X1U4G5 A0A4X1U637 A0A4X1UC71 A0A4X1UEG3 A0A4X1UEV0 A0A4X1UUZ0 A0A4X1V0A0 A0A4X1V6Y6 A0A4X1VBX0 A0A4X1VJ96 A0A4X1W415 A0A5G2QD74 A0A5G2QIG8 B3VKQ2 F1S2W1 F1S937 F1SMG8 F6PVF4 I3LJE5 I3LU4…	86	A0A140UHW4 A0A286ZJJ6 A0A286ZLJ1 A0A286ZU68 A0A286ZWZ5 A0A286ZZ97 A0A287A0V1 A0A287A119 A0A287A143 A0A287AE36 A0A287AEW3 A0A287AJT7 A0A287ANI9 A0A287AS73 A0A287B386 A0A287B5V1 A0A287B929 A0A287BHE7 A0A287BIV6 A0A287BMZ6 A0A480I6X7 A0A480JJI1 A0A480JTD7 A0A480KRD0 A0A480QIM3 A0A480TJ23 A0A480VHU8 A0A480YLY2 A0A4X1SDD8 A0A4X1SJF4 A0A4X1SK65 A0A4X1SP79 A0A4X1SWA8 A0A4X1T0T4 A0A4X1T326 A0A4X1T3C0 A0A…
GO:0009058	biosynthetic process	BP	0.0178952	48	A0A286ZNE7 A0A286ZS25 A0A286ZY03 A0A286ZZT8 A0A287AUH8 A0A287B3Y5 A0A287BK33 A0A287BKF1 A0A480ERI8 A0A480JVL0 A0A480KDK7 A0A480KQ60 A0A480LVG3 A0A480V2S8 A0A481CVE5 A0A4X1T3P5 A0A4X1T4E4 A0A4X1TI73 A0A4X1TM21 A0A4X1TNF0 A0A4X1TRW2 A0A4X1U4G5 A0A4X1U637 A0A4X1U8L3 A0A4X1UC71 A0A4X1UEG3 A0A4X1UEV0 A0A4X1UUZ0 A0A4X1V0A0 A0A4X1V6Y6 A0A4X1VBX0 A0A4X1VJ96 A0A4X1W415 A0A5G2QD74 A0A5G2QG83 A0A5G2QIG8 B3V…	90	A0A140UHW4 A0A286ZJJ6 A0A286ZLJ1 A0A286ZU68 A0A286ZWZ5 A0A286ZZ97 A0A287A0V1 A0A287A119 A0A287A143 A0A287AE36 A0A287AES5 A0A287AEW3 A0A287AJT7 A0A287ANI9 A0A287AS73 A0A287B386 A0A287B5V1 A0A287B929 A0A287BHE7 A0A287BIV6 A0A287BMZ6 A0A480I6X7 A0A480JJI1 A0A480JTD7 A0A480KRD0 A0A480QIM3 A0A480R857 A0A480TJ23 A0A480VHU8 A0A480YLY2 A0A4X1SDD8 A0A4X1SJF4 A0A4X1SK65 A0A4X1SP79 A0A4X1SWA8 A0A4X1T0T4 A0A…
GO:0004497	monooxygenase activity	MF	0.026023	6	A0A287AUH8 A0A480VJX3 A7L861 D0G6S0 I3LEX8 O97689	2	A0A0H4IV20 A0A4X1SM21
GO:0005342	organic acid transmembrane transporter activity	MF	0.0448904	2	A0A480EJY2 A0A480VUV6	5	A0A4X1TK66 A0A4X1W922 A0A5G2RNL6 A0A5K1V0Y8 B2CZF5
GO:0042611	MHC protein complex	CC	0.0448904	5	A0A480VMH3 A0A4X1V9S3 A0A5G2QCN4 A7ISN8 Q5DLX8	0
